# Supplementary material for: P4 activation by group 3 metal arene complexes
Source: Royal Society of Chemistry journal article supplement (doi:10.1039/c2cc17638f), 2012-01-01
Supplement: c2cc17638f.pdf [file c2cc17638f.pdf]

*Supporting Information for*  
**P<sub>4</sub> Activation by Group 3 Metal Arene  
Complexes**

Wenliang Huang and Paula L. Diaconescu\*

Contents:

|                                                                      |     |
|----------------------------------------------------------------------|-----|
| 1. Experimental details                                              | S2  |
| 2. NMR spectra                                                       | S6  |
| 3. Variable temperature <sup>1</sup> H NMR spectrum of <b>Y-naph</b> | S21 |
| 4. Simulation of <sup>31</sup> P NMR spectra                         | S22 |
| 5. X-ray crystallography data                                        | S25 |
| 6. DFT calculations                                                  | S30 |
| 7. References                                                        | S51 |

# 1. Experimental Details

**General Considerations:** All experiments were performed under a dry nitrogen atmosphere using standard Schlenk techniques or an MBraun inert-gas glove box. Solvents were purified using a two-column solid-state purification system by the method of Grubbs<sup>1</sup> and transferred to the glove box without exposure to air. NMR solvents were obtained from Cambridge Isotope Laboratories, freezer-pump-thaw three times, and stored over activated molecular sieves prior to use. Scandium oxide and yttrium oxide were purchased from Stanford Materials Corporation, 4 Meadowpoint, Aliso Viejo, CA 92656, and used as received. **Sc-naph**, **Sc-anth**, and  $\text{Y}(\text{CH}_2\text{Ph})_3(\text{THF})_3$  were prepared following published procedures.<sup>2, 3</sup> Other organic substrates were used as received (for solids) or freeze-dumped-thawed three times and stored over molecular sieves (for liquids). NMR spectra were recorded on Bruker300 or Bruker500 (work supported by the NSF grants CHE-9974928 and CHE-0116853) at room temperature in  $\text{C}_6\text{D}_6$  unless otherwise specified. Chemical shifts are reported with respect to internal solvent ( $\text{C}_6\text{D}_6$ ,  $\text{C}_7\text{D}_8$ , or  $d_8$ -tetrahydrofuran). CHN analyses were performed on CE-440 Elemental Analyzer manufactured by EXETER ANALYTICAL, INC.

**Synthesis of  $[(\text{NN}^{\text{fc}})\text{Sc}]_4\text{P}_8$  (**Sc<sub>4</sub>P<sub>8</sub>**) and  $[(\text{NN}^{\text{fc}})\text{Sc}]_3\text{P}_7$  (**Sc<sub>3</sub>P<sub>7</sub>**).** **Sc-naph** (0.316 g, 0.286 mmol) was dissolved in 15 mL of toluene in a Schlenk tube and  $\text{P}_4$  (0.036 g, 0.291 mmol) was added as a 5 mL toluene solution. The mixture was stirred at 25 °C for 22.5 h. The initial dark blue color turned to green after 15 min stirring. Then the color gradually changed from green to light green and finally to orange. After stirring, the volatiles were removed under reduced pressure. The resulting orange solid was extracted by pentane, diethyl ether and toluene. Based on  $^1\text{H}$  NMR spectroscopy, pentane extraction was mostly **Sc<sub>3</sub>P<sub>7</sub>** while diethyl ether and toluene extraction contained mostly **Sc<sub>4</sub>P<sub>8</sub>**. **Sc<sub>3</sub>P<sub>7</sub>** was collected as orange micro-crystals precipitated from pentane. Yield: 0.100 g, 31.2 % (based on Sc). The diethyl ether and toluene extraction were combined and dried down under reduced pressure. The resulting yellow solid was further washed with pentane to get clean **Sc<sub>4</sub>P<sub>8</sub>**. Yield: 0.147 g, 46.8 %. **Sc<sub>4</sub>P<sub>8</sub>**:  $^1\text{H}$  NMR (500 MHz,  $\text{C}_6\text{D}_6$ , 25 °C)  $\delta$ , ppm: 4.65, 4.46, 4.07, 4.03, 4.01, 3.96, 3.93, and 3.79 (m, 32H, CH on Cp rings), 1.20, and 1.19 (s, 72H, SiCCH<sub>3</sub>), and 0.92, 0.37, 0.36, and 0.29 (s, 48H, SiCH<sub>3</sub>).  $^{13}\text{C}$  NMR (126 MHz,  $\text{C}_6\text{D}_6$ , 25 °C)  $\delta$ , ppm: 107.4, and 105.7 (CN on Cp rings), 71.3, 71.1, 70.4, 70.1, 69.8, 66.5, and 64.3 (CH on Cp rings), 28.5, and 27.7 (SiCCH<sub>3</sub>), 20.6, and 20.1 (SiCCH<sub>3</sub>), and 2.0, 0.4, -1.2, and -1.3 (SiCH<sub>3</sub>).  $^{31}\text{P}$  NMR (122 MHz,  $\text{C}_6\text{D}_6$ , 25 °C)  $\delta$ , ppm: 96.2 (m, 4P, P<sub>corner</sub>), and 45.7 (m, 4P, P<sub>inner</sub>). Anal. (%): Calcd. for  $\text{C}_{88}\text{H}_{152}\text{N}_8\text{Fe}_4\text{Sc}_4\text{Si}_8\text{P}_8$  with half molecule of toluene: C, 48.97; H, 7.01; N, 4.99. Found: C, 48.76; H, 6.60; N, 5.19. **Sc<sub>3</sub>P<sub>7</sub>**:  $^1\text{H}$  NMR (500 MHz,  $\text{C}_6\text{D}_6$ , 25 °C)  $\delta$ , ppm: 4.62, 4.03, 3.88, and 3.83 (b, 24H, CH on Cp rings), 1.15 (s, 54H, SiCCH<sub>3</sub>), and 0.72, and 0.35 (s, 12H, SiCH<sub>3</sub>).  $^{13}\text{C}$  NMR (126 MHz,  $\text{C}_6\text{D}_6$ , 25 °C)  $\delta$ , ppm: 106.2 (CN on Cp rings), 71.3, 69.8, 67.2, and 66.0 (CH on Cp rings), 28.1 (SiCCH<sub>3</sub>), 20.3 (SiCCH<sub>3</sub>), and 0.2, and -0.3 (SiCH<sub>3</sub>).  $^{31}\text{P}$  NMR (122 MHz,  $\text{C}_6\text{D}_6$ , 25 °C)  $\delta$ , ppm: 23.2 (m, 3P, P<sub>edge</sub>), -118.9 (m, 1P, P<sub>cap</sub>), and -131.4 (m, 3P, P<sub>bottom</sub>). Anal. (%): Calcd. for  $\text{C}_{66}\text{H}_{114}\text{N}_6\text{Fe}_3\text{Sc}_3\text{Si}_6\text{P}_7$  with one molecule of hexanes: C, 48.98; H, 7.31; N, 4.75. Found: C, 48.77; H, 7.29; N, 4.89.

**Reaction of  $(\text{NN}^{\text{fc}})\text{ScI}(\text{THF})_2$  with  $\text{P}_4$  and  $\text{KC}_8$ .**  $(\text{NN}^{\text{fc}})\text{ScI}(\text{THF})_2$  (0.0496 g, 0.0654 mmol),  $\text{P}_4$  (0.0050 g, 0.040 mmol) and  $\text{KC}_8$  (0.0115 g, 0.0851 mmol) were dissolved in 5 mL cold THF. The reaction mixture was allowed to stir at -78 °C in a dry ice/acetone bath. Then the volatiles were removed under reduced pressure. The crude reaction mixture was checked by  $^1\text{H}$  NMR spectroscopy. Further work-up did not give isolable products.

**Reaction of Sc-naph with 1.03 equiv of P<sub>4</sub>.** **Sc-naph** (0.0295 g, 0.0267 mmol) and P<sub>4</sub> (0.0034 g, 0.0274 mmol) were dissolved in 5 mL of toluene. The reaction mixture was stirred at 25 °C for 45 min until the color turned to light green. Then the volatiles were removed under reduced pressure. The resulting greenish solid was taken into d<sub>8</sub>-toluene. After leaving it at 25 °C for 2 days, the reaction reached completion as indicated by no **Sc-naph** left over. Based on integration in <sup>31</sup>P NMR spectrum, **Sc<sub>3</sub>P<sub>7</sub>** and **Sc<sub>4</sub>P<sub>8</sub>** were formed in a 0.5:1 ratio (27% and 73% yields on Sc, respectively). Assuming all P-atoms in P<sub>4</sub> converted into either **Sc<sub>3</sub>P<sub>7</sub>** or **Sc<sub>4</sub>P<sub>8</sub>**, the stoichiometry of P<sub>4</sub> was calculated to be 1.04 equiv, which is very close to the experimental value of 1.03 equiv.

**Reaction of Sc-naph with 1.24 equiv of P<sub>4</sub>.** **Sc-naph** (0.0265 g, 0.0240 mmol) and P<sub>4</sub> (0.0037 g, 0.0299 mmol) were dissolved in C<sub>6</sub>D<sub>6</sub> in a J-Young tube. The reaction mixture was immersed in a 70 °C bath for 10 min to enhance the solubility of **Sc-naph** in C<sub>6</sub>D<sub>6</sub>. Then the reaction was kept at 25 °C and monitored by <sup>1</sup>H NMR spectroscopy. After 2 days at 25 °C, the reaction reached completion as indicated by no **Sc-naph** left over. Based on integration in <sup>31</sup>P NMR spectrum, **Sc<sub>3</sub>P<sub>7</sub>** and **Sc<sub>4</sub>P<sub>8</sub>** were formed in a 2.1:1 ratio (61% and 39% yields on Sc, respectively), while some P<sub>4</sub> was left over (ratio of **Sc<sub>3</sub>P<sub>7</sub>** vs left over P<sub>4</sub> is 2.1:0.5). Assuming all P-atoms in consumed P<sub>4</sub> converted into either **Sc<sub>3</sub>P<sub>7</sub>** or **Sc<sub>4</sub>P<sub>8</sub>** and including the left over P<sub>4</sub>, the stoichiometry of P<sub>4</sub> was calculated to be 1.20 equiv, which is close to the experimental value of 1.24 equiv. Note: further heating of the reaction mixture led to no change.

**Reaction of Sc-anth with 0.98 equiv of P<sub>4</sub>.** **Sc-anth** (0.0200 g, 0.0173 mmol) and P<sub>4</sub> (0.0021 g, 0.0169 mmol) were dissolved in C<sub>6</sub>D<sub>6</sub> in a J-Young tube. The J-Young tube was then immersed in a 50 °C oil bath. The reaction was monitored based on the integration ratio between free anthracene and **Sc-anth**. After 2 days of heating at 50 °C, the reaction reached completion as indicated by no <sup>31</sup>P signal for free P<sub>4</sub> and no change in the ratio between free anthracene and **Sc-anth**. Based on integration in <sup>1</sup>H NMR spectrum, 10% unreacted **Sc-anth** was left in solution; based on the integration in <sup>31</sup>P NMR spectrum, **Sc<sub>3</sub>P<sub>7</sub>** and **Sc<sub>4</sub>P<sub>8</sub>** were formed in a 1.5:1 ratio (48% and 42% yields on Sc, respectively). Assuming all P-atoms in P<sub>4</sub> converted to either **Sc<sub>3</sub>P<sub>7</sub>** or **Sc<sub>4</sub>P<sub>8</sub>**, the stoichiometry of P<sub>4</sub> was calculated to be 0.98 equiv, which matches perfectly with the experimental value of 0.98 equiv. Note: further heating of the reaction mixture led to no change.

**Synthesis of (NN<sup>fc</sup>)YI(THF)<sub>2</sub> (YI(THF)<sub>2</sub>).** Y(CH<sub>2</sub>Ph)<sub>3</sub>(THF)<sub>3</sub> (0.869 g, 1.50 mmol) and 1,1'-fc(NHSi<sup>t</sup>BuMe<sub>2</sub>)<sub>2</sub> (0.668 g, 1.50 mmol) were each dissolved in 5 mL THF (tetrahydrofuran) in a vial and cooled down with a dry ice/acetone bath. After cooling for 15 min, the THF solution of 1,1'-fc(NHSi<sup>t</sup>BuMe<sub>2</sub>)<sub>2</sub> was added to the Y(CH<sub>2</sub>Ph)<sub>3</sub>(THF)<sub>3</sub> solution. The mixture was warmed up to 0 °C and stirred for 1 h. Then the volatiles were removed under reduced pressure. The resulting orange solid ((NN<sup>fc</sup>)Y(CH<sub>2</sub>Ph)(THF)<sub>2</sub>) was extracted into 12 mL toluene and filtered through Celite. TMSI (trimethylsilyl iodide) (0.601 g, 3.00 mmol) was added as a toluene solution to crude (NN<sup>fc</sup>)Y(CH<sub>2</sub>Ph)(THF)<sub>2</sub> (toluene solution). The reaction mixture was stirred at 25 °C for 4 h. The volatiles were removed under reduced pressure. The remaining oily yellow powder was dissolved in a minimum amount of diethyl ether and layered with pentane. After storing in a freezer at -35 °C overnight, hexagonal orange crystals of **YI(THF)<sub>2</sub>** were collected by decanting and washing with cold pentane. Yield: 0.768 g, 63.7 %. <sup>1</sup>H NMR (500 MHz, C<sub>6</sub>D<sub>6</sub>, 25 °C) δ, ppm: 4.07 and 3.10 (b, 8H, CH on Cp rings), 4.06 (b, 8H, CH<sub>2</sub>O), 1.40 (m, 8H, CH<sub>2</sub>CH<sub>2</sub>), 1.02 (s, 18H, SiCCH<sub>3</sub>), and 0.44 (s, 12H, SiCH<sub>3</sub>). <sup>13</sup>C NMR (126 MHz, C<sub>6</sub>D<sub>6</sub>, 25 °C) δ, ppm: 102.9 (CN on Cp rings), 72.6 (CH<sub>2</sub>O), 67.6, and 67.1 (CH on Cp rings), 28.0 (SiCCH<sub>3</sub>),

25.0 (CH<sub>2</sub>CH<sub>2</sub>O), 20.6 (SiCCH<sub>3</sub>), and -1.0 (SiCH<sub>3</sub>). Anal. (%): Calcd. for C<sub>30</sub>H<sub>54</sub>N<sub>2</sub>FeIO<sub>2</sub>Si<sub>2</sub>Y: C, 44.90; H, 6.78; N, 3.49. Found: C, 44.70; H, 6.56; N, 3.47.

**Synthesis of [(NN<sup>fc</sup>)Y(THF)]<sub>2</sub>(μ-C<sub>10</sub>H<sub>8</sub>) (Y-naph). YI(THF)<sub>2</sub> (0.410 g, 0.511 mmol) and 0.5 equiv of naphthalene (0.0350 g, 0.273 mmol) were dissolved in 10 mL of THF. The solution was cooled down to -78 °C using a dry ice/acetone bath. Then KC<sub>8</sub> (0.125 g, 0.925 mmol) was added to the solution. The color immediately turned to dark red. The reaction mixture was allowed to stir at room temperature for 2 h. 6 mL of hexanes was added to the reaction mixture to minimize the solubility of salt KI. The solution was then filtered through Celite. The solid left on Celite was washed with 4 mL THF/hexanes (3:1 ratio). After removing volatiles under reduced pressure, the remaining reddish-purple solid was transferred into a vial using 18 mL THF. The THF was removed under reduced pressure, resulting in a reddish-purple solid. 6 mL of diethyl ether was added and the mixture was kept at -35 °C. After one day, the diethyl ether solution was filtered and **Y-naph** was collected as a reddish-purple solid on the medium frit. Yield: 0.214 g, 62.6 %. <sup>1</sup>H NMR (500 MHz, C<sub>6</sub>D<sub>6</sub>, 25 °C) δ, ppm: 5.09 and 3.94 (t, 8H, CH of naphthalene), 4.33, 4.13 and 3.87 (b, 24H, CH on Cp rings and CH<sub>2</sub>O), 1.42 (b, 8H, CH<sub>2</sub>CH<sub>2</sub>O), 1.07 (s, 36H, SiCCH<sub>3</sub>), and 0.22 and 0.13 (s, 24H, SiCH<sub>3</sub>). <sup>1</sup>H NMR (500 MHz, C<sub>4</sub>D<sub>8</sub>O, 25 °C) δ, ppm: 5.01 and 3.66 (t, 8H, CH of naphthalene), 4.25, and 3.83 (b, 16H, CH on Cp rings), 0.73 (s, 36H, SiCCH<sub>3</sub>), and -0.03 (s, 24H, SiCH<sub>3</sub>). <sup>13</sup>C NMR (126 MHz, C<sub>4</sub>D<sub>8</sub>O, 25 °C) δ, ppm: 158.3, 118.3 and 94.3 (C and CH on naphthalene), 108.4 (CN on Cp rings), signals of CH on Cp rings were covered by solvent C<sub>4</sub>D<sub>8</sub>O peaks, 28.5 (SiCCH<sub>3</sub>), 21.2 (SiCCH<sub>3</sub>) and -1.7 (SiCH<sub>3</sub>). Anal. (%): Calcd. for C<sub>62</sub>H<sub>100</sub>N<sub>4</sub>Fe<sub>2</sub>O<sub>2</sub>Si<sub>4</sub>Y<sub>2</sub>: C, 55.77; H, 7.55; N, 4.20. Found: C, 55.22; H, 7.20; N, 4.53.**

**Synthesis of [(NN<sup>fc</sup>)Y(THF)]<sub>3</sub>P<sub>7</sub> (Y<sub>3</sub>P<sub>7</sub>). Y-naph (0.150 g, 0.112 mmol) was dissolved in 10 mL of THF and cooled down to -78 °C with a dry ice/acetone bath for 15 min. P<sub>4</sub> (0.0189 g, 0.153 mmol) was then added as a THF solution. The color of solution gradually changed from reddish-purple to orange. After stirring for 1 h at 25 °C, the volatiles were removed under reduced pressure. The resulting orange solid was washed with pentane until the pentane wash was very light yellow. **Y<sub>3</sub>P<sub>7</sub>** was isolated as a yellow powder. Yield: 0.106 g, 69.7%. <sup>1</sup>H NMR (500 MHz, C<sub>6</sub>D<sub>6</sub>, 25 °C) δ, ppm: 4.18, 3.94, and 3.41 (b, 24H, CH on Cp rings), 4.04 (b, 12H, CH<sub>2</sub>O), 1.48 (b, 12H, CH<sub>2</sub>CH<sub>2</sub>), 1.19 (s, 54H, SiCCH<sub>3</sub>), and 0.61, and 0.28 (s, 24H, SiCH<sub>3</sub>). Due to low solubility of **Y<sub>3</sub>P<sub>7</sub>** in C<sub>6</sub>D<sub>6</sub>, the <sup>13</sup>C NMR experiment was performed at higher temperature (75 °C). The <sup>1</sup>H NMR spectrum at 75 °C is also included here since it was different from that at 25 °C. <sup>1</sup>H NMR (500 MHz, C<sub>6</sub>D<sub>6</sub>, 75 °C) δ, ppm: 4.13, 4.04, and 3.55 (b, 24H, CH on Cp rings), 3.95 (b, 12H, CH<sub>2</sub>O), 1.55 (b, 12H, CH<sub>2</sub>CH<sub>2</sub>), 1.13 (s, 54H, SiCCH<sub>3</sub>), and 0.55, and 0.29 (s, 24H, SiCH<sub>3</sub>). <sup>13</sup>C NMR (126 MHz, C<sub>6</sub>D<sub>6</sub>, 75 °C) δ, ppm: 106.1 (CN on Cp rings), 70.3, 69.1, and 66.4 (CH on Cp rings), 68.4 (CH<sub>2</sub>O), 28.3 (SiCCH<sub>3</sub>), 25.5 (CH<sub>2</sub>CH<sub>2</sub>O), 20.6 (SiCCH<sub>3</sub>), and -0.5 (SiCH<sub>3</sub>). <sup>31</sup>P NMR (122 MHz, C<sub>6</sub>D<sub>6</sub>, 25 °C) δ, ppm: -20.4 (b, 3P, P<sub>edge</sub>), -81.8 (b, 1P, P<sub>cap</sub>), and -130.4 (b, 3P, P<sub>bottom</sub>). Anal. (%): Calcd. for C<sub>78</sub>H<sub>138</sub>N<sub>6</sub>Fe<sub>3</sub>O<sub>3</sub>P<sub>7</sub>Si<sub>6</sub>Y<sub>7</sub> with 1 molecule of toluene, C<sub>7</sub>H<sub>8</sub>: C, 48.16; H, 6.94; N, 3.96. Found: C, 47.88; H, 6.99; N, 3.87.**

**General reaction set-up for M<sub>3</sub>P<sub>7</sub> (M = Sc, Y) and TMSI (trimethylsilyl iodide).** 0.015 g **M<sub>3</sub>P<sub>7</sub>** was dissolved in C<sub>6</sub>D<sub>6</sub> in a J-Young tube. Excess TMSI was added at room temperature and the reaction was monitored by <sup>1</sup>H NMR spectroscopy. For M = Sc, no obvious change was observed after 1 h at room temperature; so, the J-Young tube was placed in a 50 °C oil bath. The transformation reached completion after 23 h at 50 °C with the formation of (NN<sup>fc</sup>)ScI and P<sub>7</sub>(TMS)<sub>3</sub>, which was confirmed by <sup>31</sup>P NMR spectra. For M = Y, the transformation took place

at room temperature and reached completion after 9 h. The formation of (NN<sup>fc</sup>)YI and P<sub>7</sub>(TMS)<sub>3</sub> were confirmed by <sup>1</sup>H and <sup>31</sup>P NMR spectroscopy, respectively.

Note: The attempt to transfer the P<sub>8</sub><sup>4-</sup> unit in **Sc<sub>4</sub>P<sub>8</sub>** with TMSI was not successful. Even after prolonged heating (2 days) at 100 °C with excess TMSI, **Sc<sub>4</sub>P<sub>8</sub>** remained intact.

## 2. NMR Spectra

$^1\text{H}$  NMR spectrum of  $\text{Sc}_4\text{P}_8$  (500 MHz,  $\text{C}_6\text{D}_6$ , 25 °C)

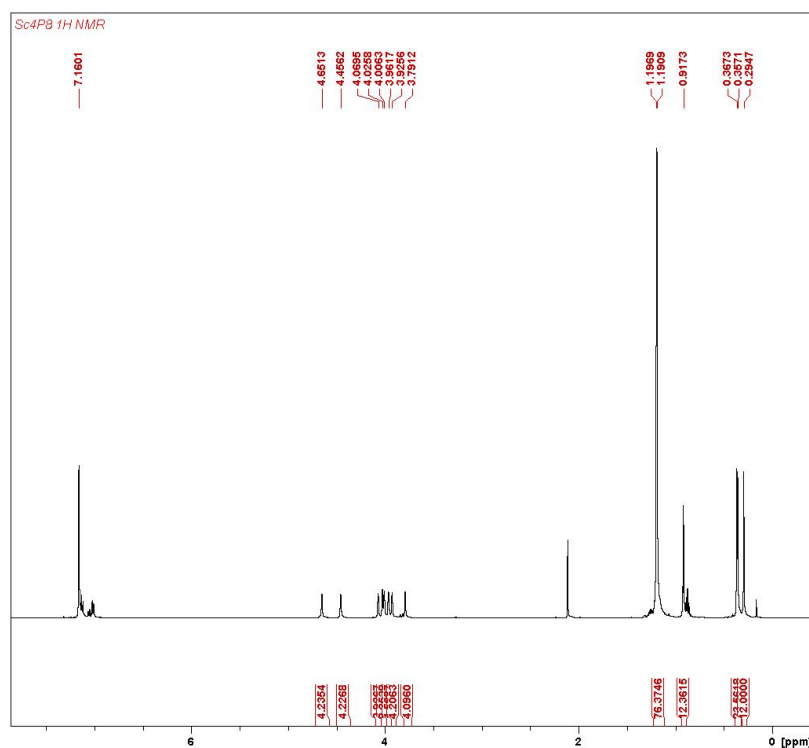

$^{13}\text{C}$  NMR spectrum of  $\text{Sc}_4\text{P}_8$  (126 MHz,  $\text{C}_6\text{D}_6$ , 25 °C)

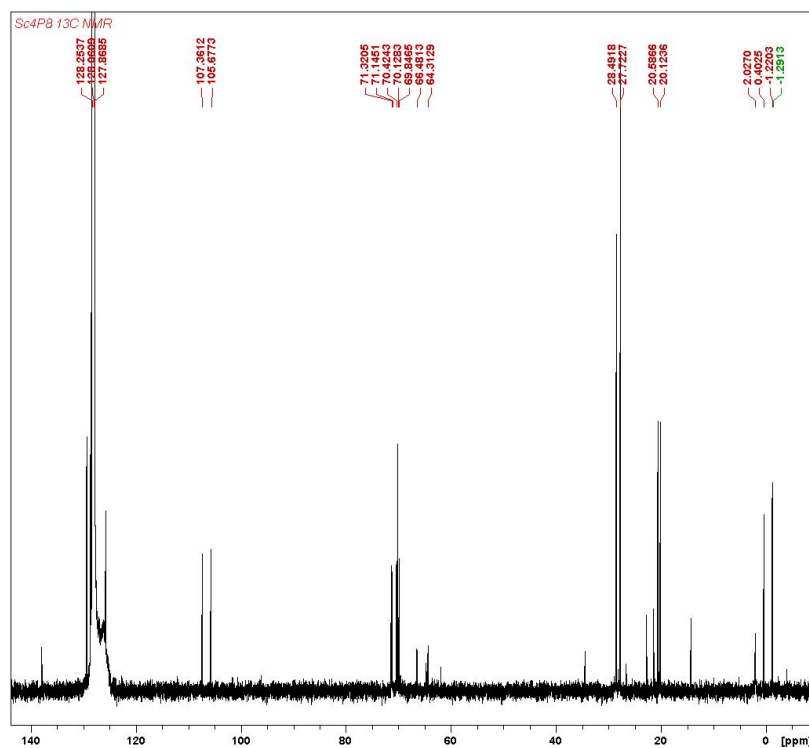

$^{31}\text{P}$  NMR spectrum of  $\text{Sc}_4\text{P}_8$  (203 MHz,  $\text{C}_6\text{D}_6$ , 25 °C)

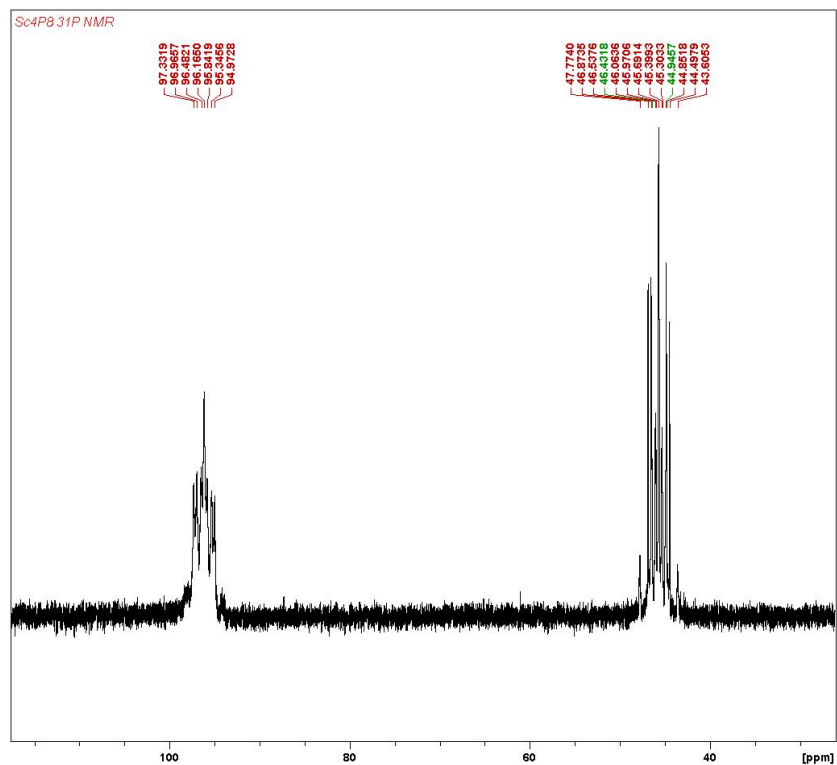

$^{31}\text{P}$  NMR spectrum of  $\text{Sc}_4\text{P}_8$  (122 MHz,  $\text{C}_7\text{D}_8$ , -80 °C)

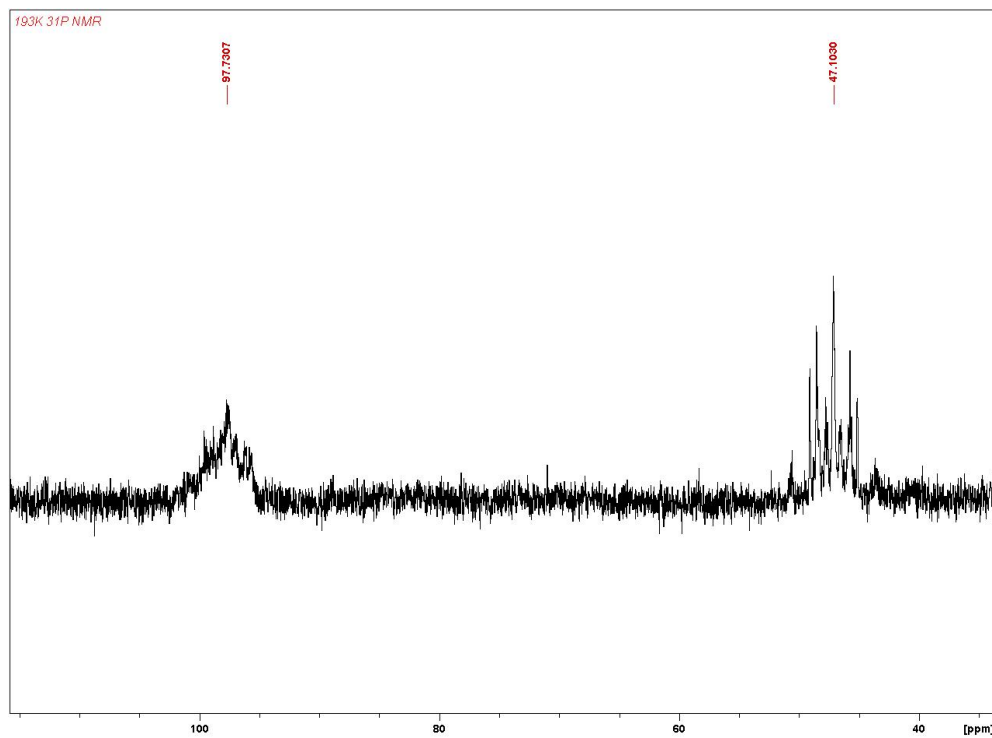

$^1\text{H}$  NMR spectrum of  $\text{Sc}_3\text{P}_7$  (500 MHz,  $\text{C}_6\text{D}_6$ , 25°C)

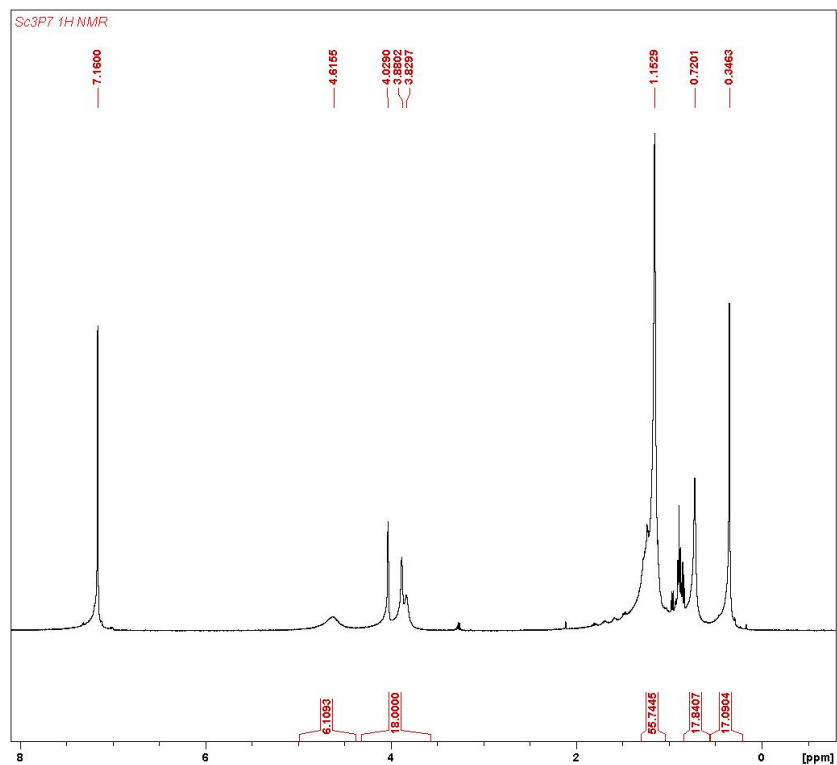

$^{13}\text{C}$  NMR spectrum of  $\text{Sc}_3\text{P}_7$  (500 MHz,  $\text{C}_6\text{D}_6$ , 25°C)

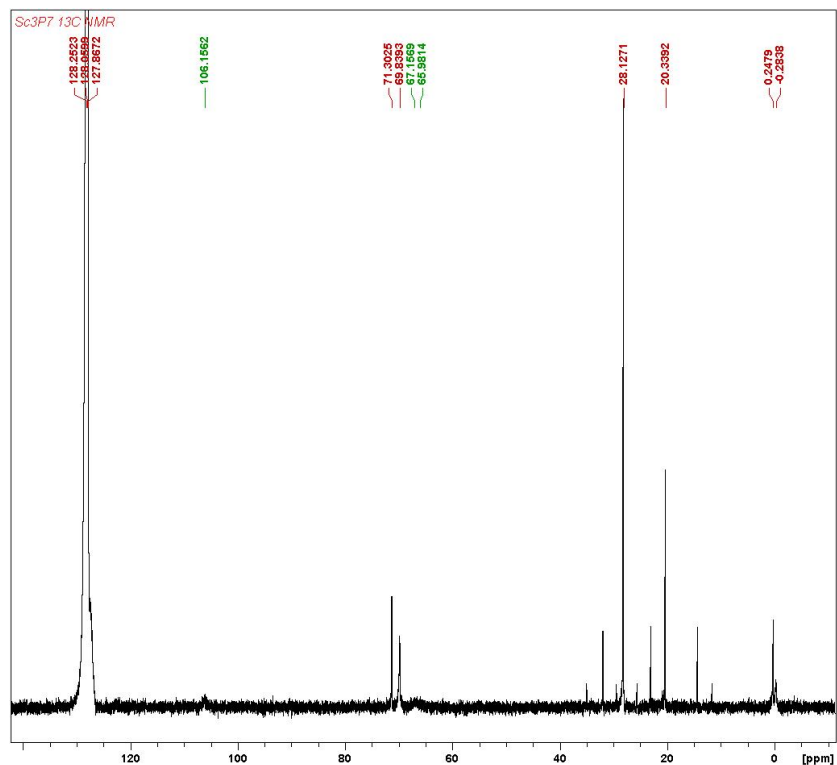



$^{31}\text{P}$  NMR spectrum of  $\text{Sc}_3\text{P}_7$  (122 MHz,  $\text{C}_6\text{D}_6$ , 25°C)

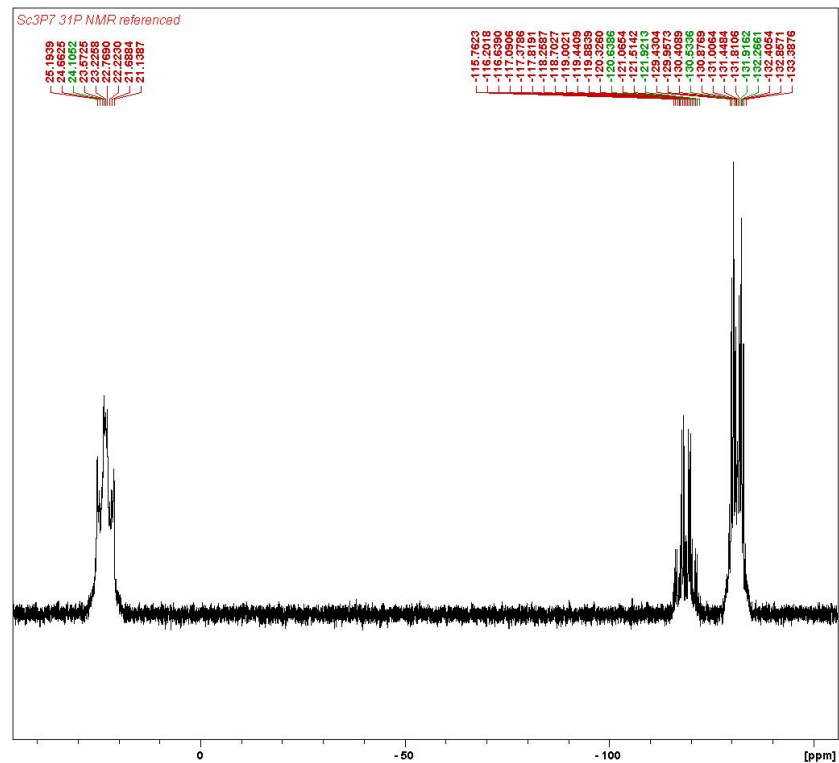

Product distribution of **Sc-naph** with 1.03 equiv of  $P_4$ :

$^1H$  NMR spectrum (500 MHz,  $C_7D_8$ , 25°C)

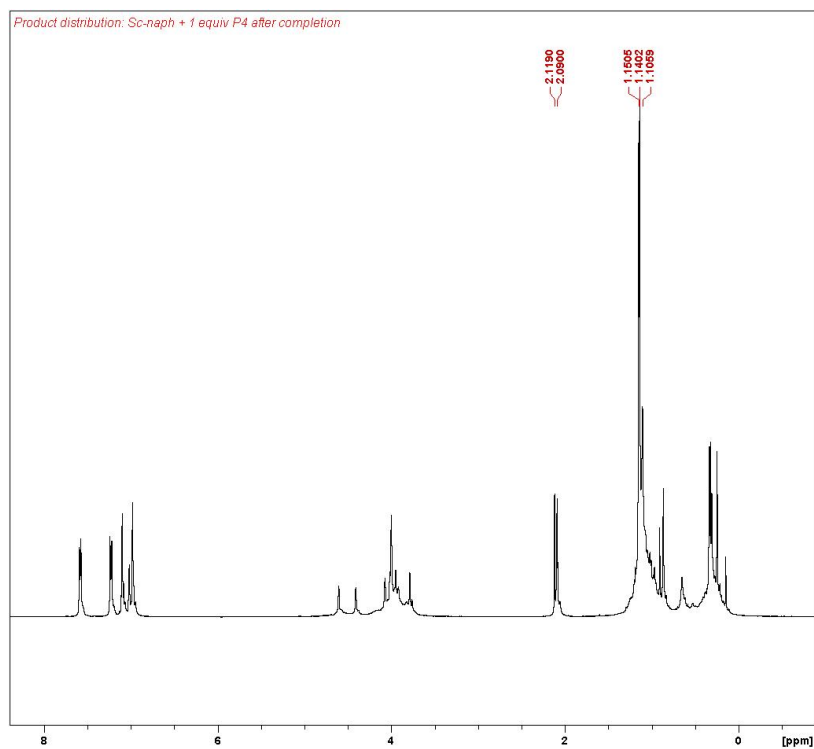

$^{31}P$  NMR spectrum (122 MHz,  $C_7D_8$ , 25°C)

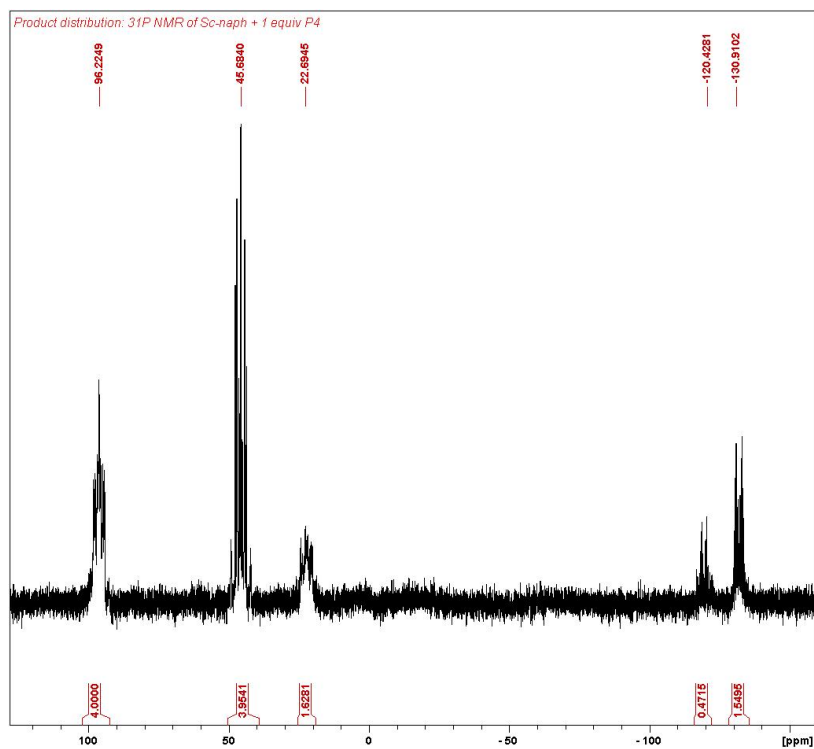

Product distribution of **Sc-naph** with 1.24 equiv of  $P_4$ :

$^1H$  NMR spectrum (300 MHz,  $C_6D_6$ , 25°C)

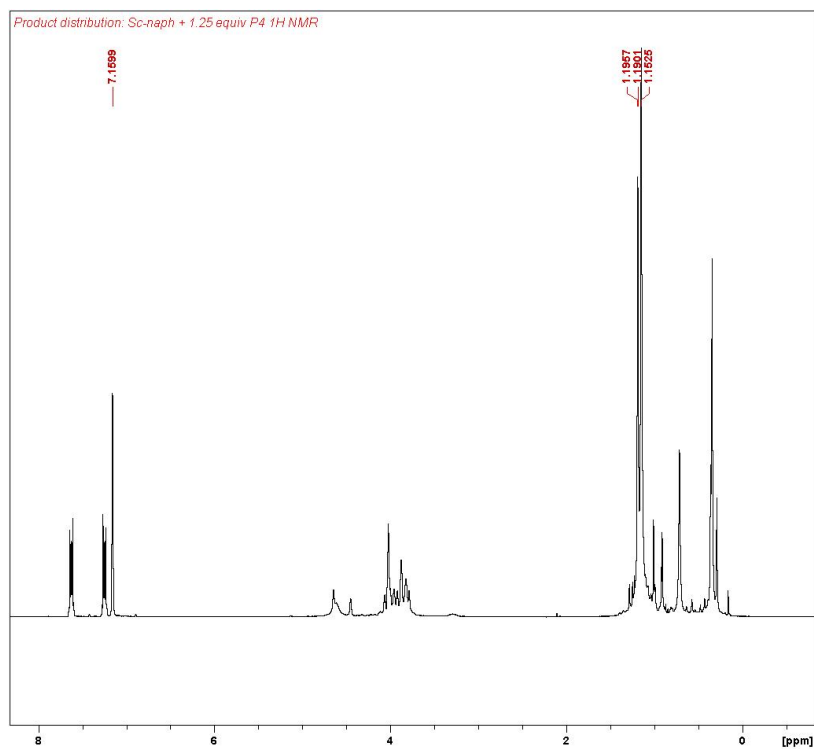

$^{31}P$  NMR spectrum (122 MHz,  $C_6D_6$ , 25°C, centered at 0 ppm)

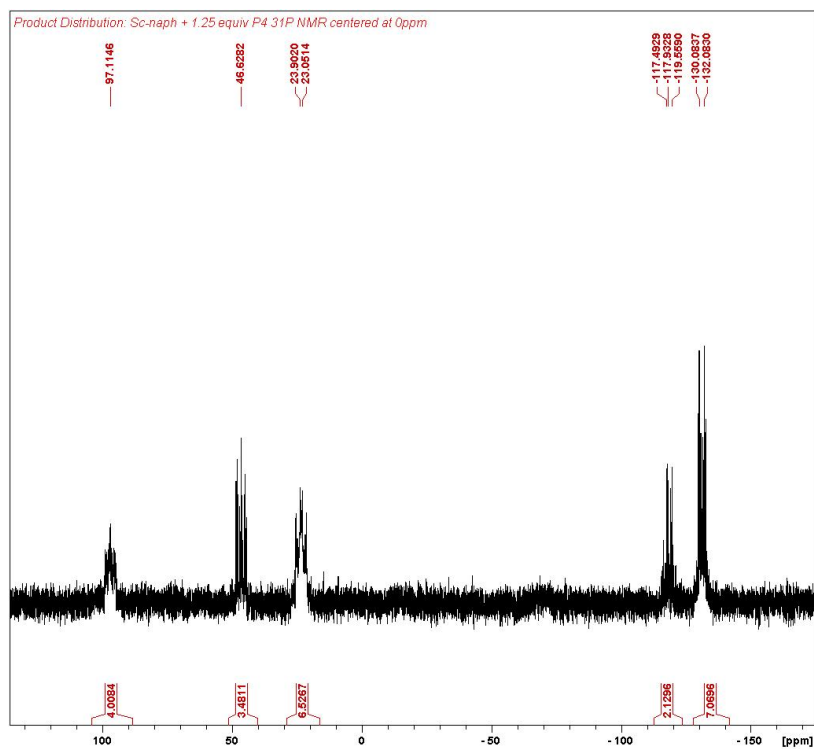

$^{31}\text{P}$  NMR spectrum (122 MHz,  $\text{C}_6\text{D}_6$ , 25°C, centered at -300 ppm)

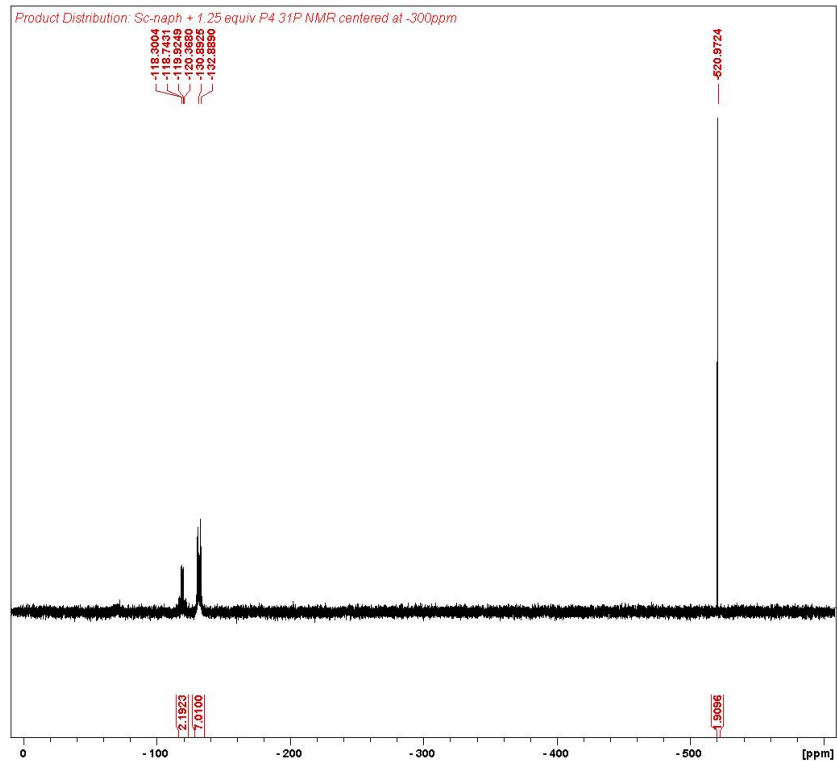

Product distribution of **Sc-anth** with 0.98 equiv of  $P_4$ :

$^1H$  NMR spectrum (300 MHz,  $C_6D_6$ , 25°C)

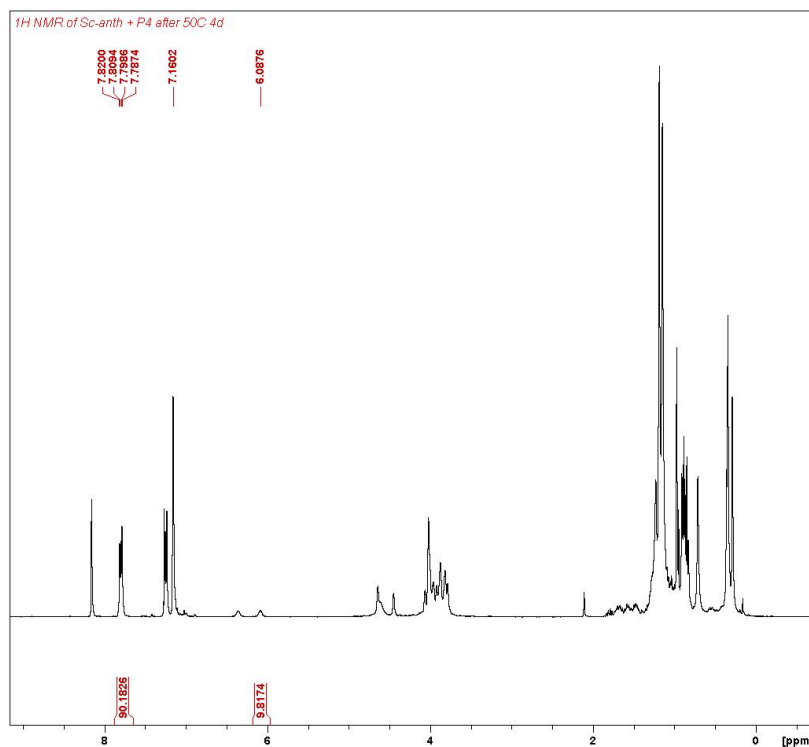

$^{31}P$  NMR spectrum (122 MHz,  $C_6D_6$ , 25°C)

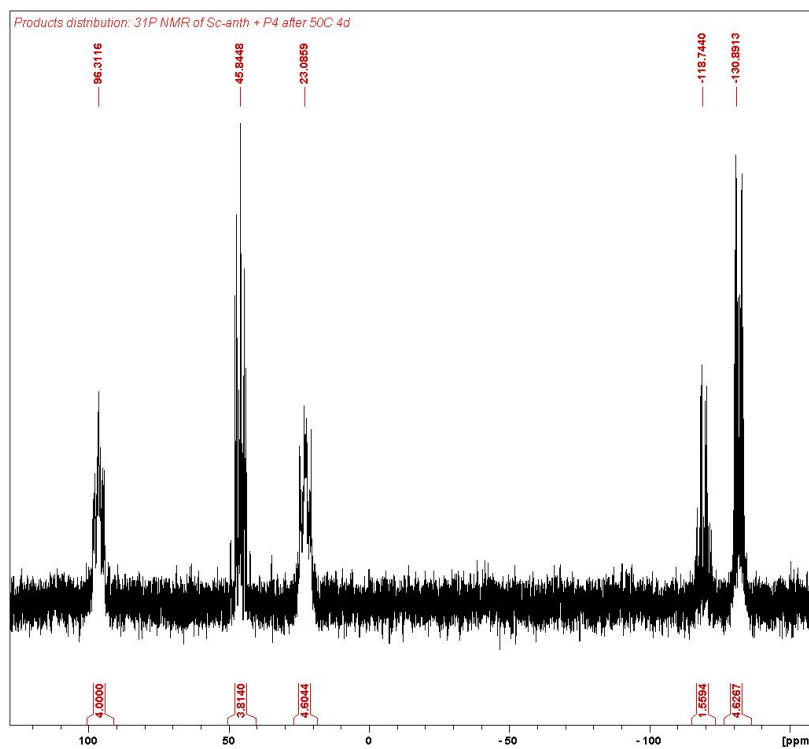

$^1\text{H}$  NMR spectrum of  $(\text{NN}^{\text{fc}})\text{YI}(\text{THF})_2$  (500 MHz,  $\text{C}_6\text{D}_6$ ,  $25^\circ\text{C}$ )

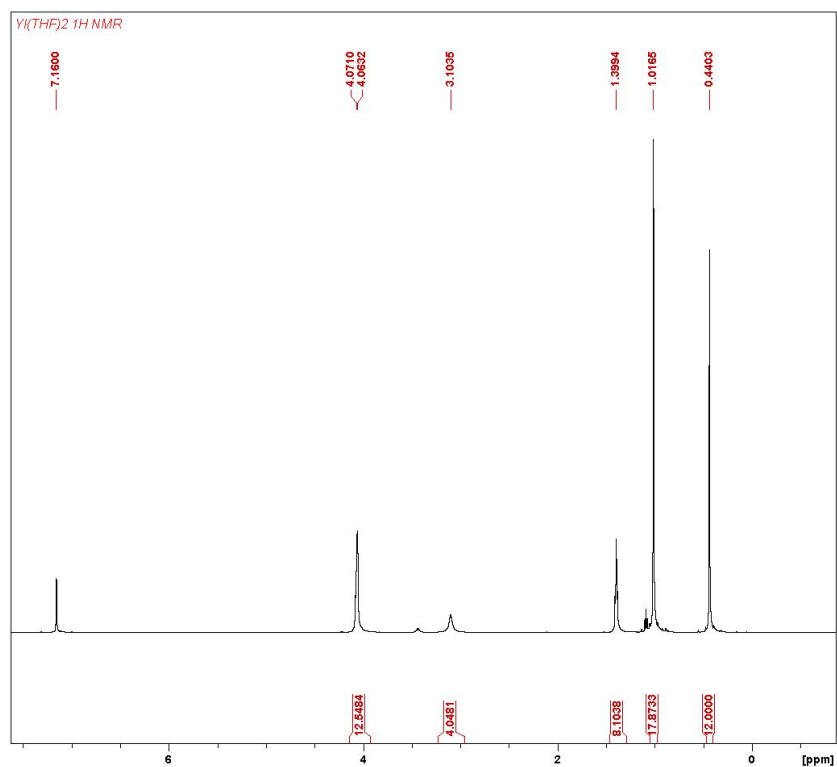

$^{13}\text{C}$  NMR spectrum of  $(\text{NN}^{\text{fc}})\text{YI}(\text{THF})_2$  (500 MHz,  $\text{C}_6\text{D}_6$ ,  $25^\circ\text{C}$ )

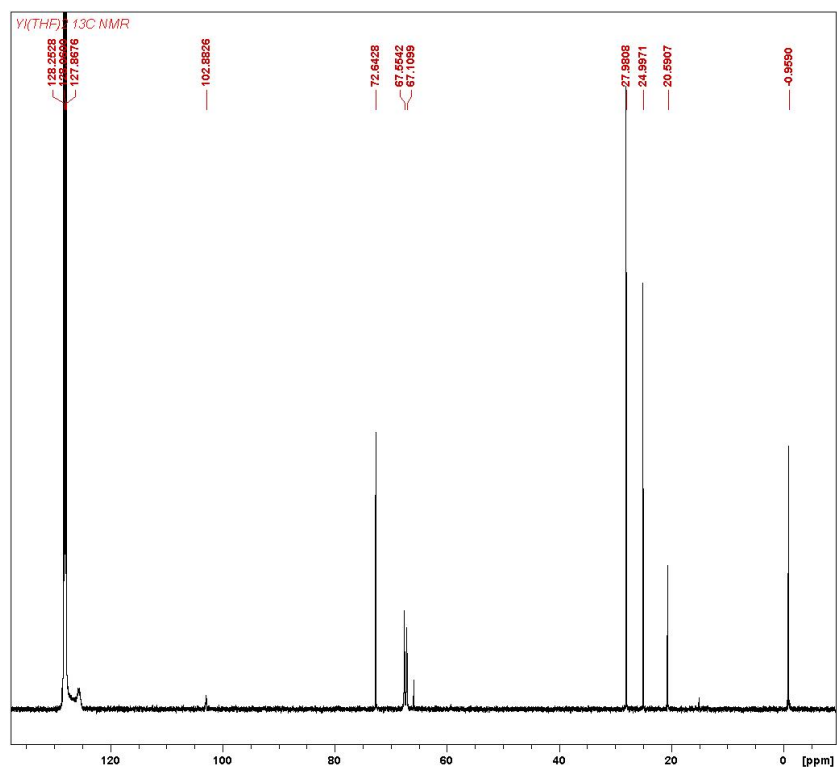

$^1\text{H}$  NMR spectrum of **Y-naph** (500 MHz,  $\text{C}_6\text{D}_6$ , 25°C)

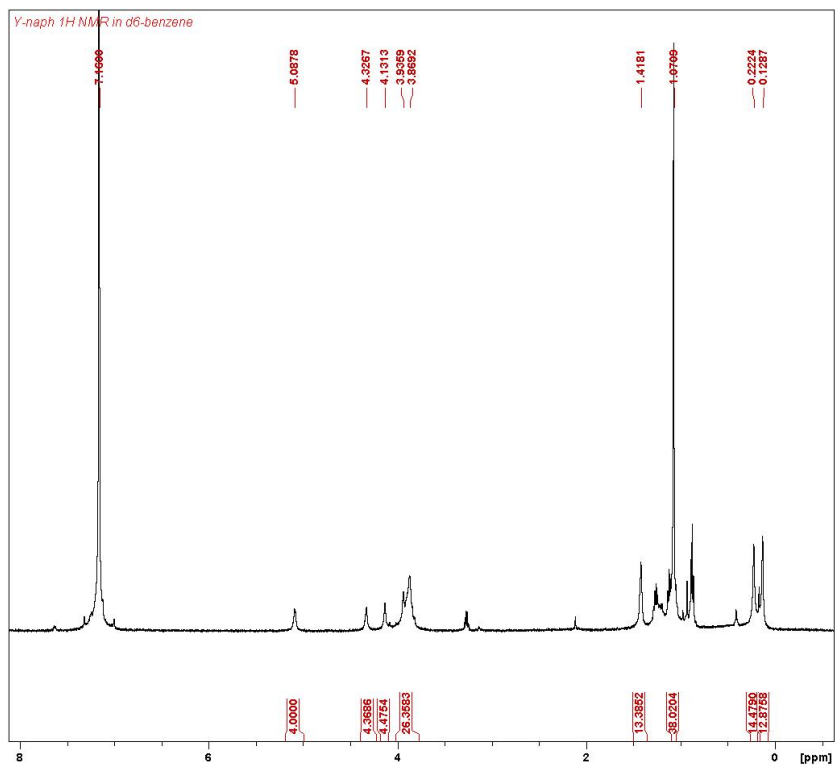

$^1\text{H}$  NMR spectrum of **Y-naph** (500 MHz,  $\text{C}_4\text{D}_8\text{O}$ , 25°C)

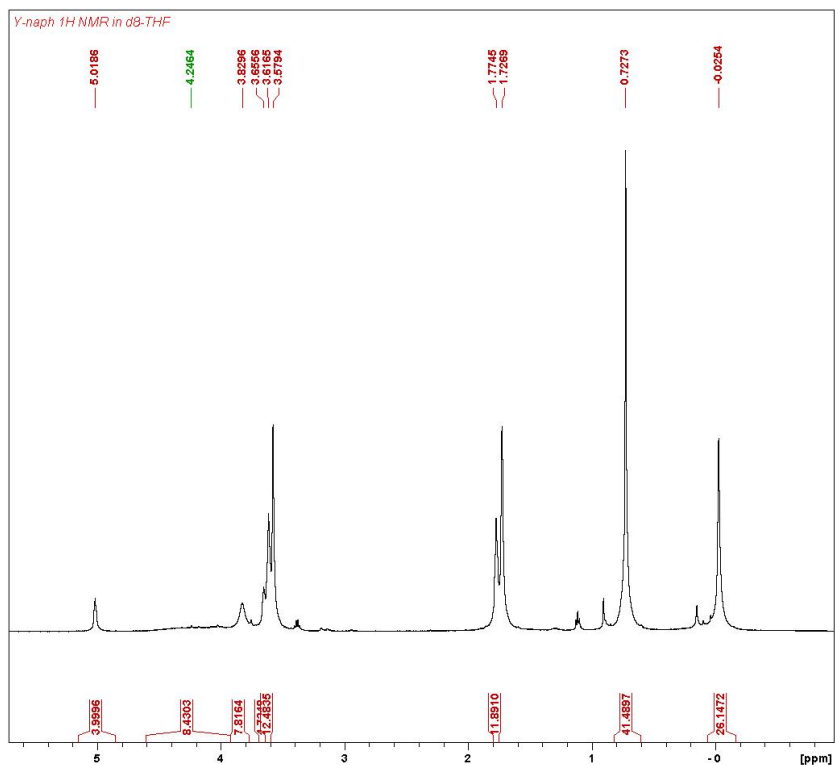

$^{13}\text{C}$  NMR spectrum of **Y-naph** (500 MHz,  $\text{C}_4\text{D}_8\text{O}$ ,  $25^\circ\text{C}$ )

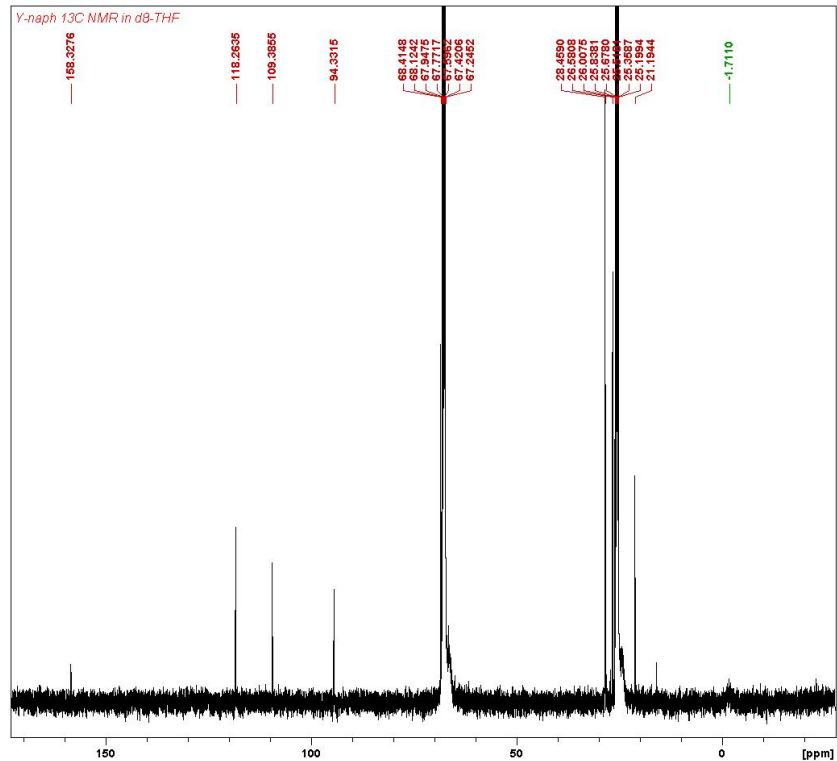



$^1\text{H}$  NMR spectrum of  $\text{Y}_3\text{P}_7$  (500 MHz,  $\text{C}_6\text{D}_6$ , 25°C)

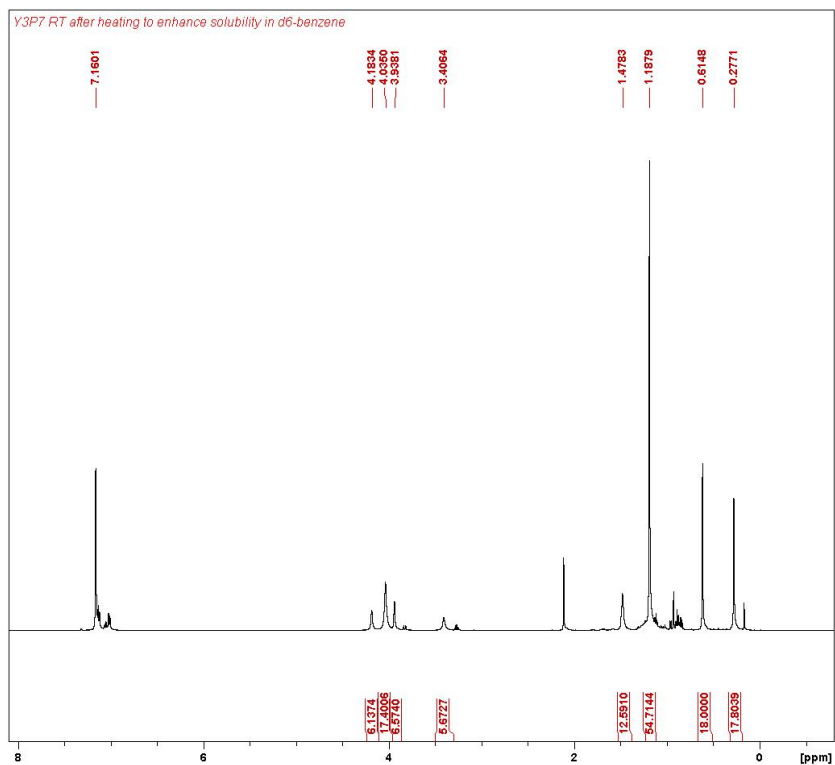

$^1\text{H}$  NMR spectrum of  $\text{Y}_3\text{P}_7$  (500 MHz,  $\text{C}_6\text{D}_6$ , 75°C)

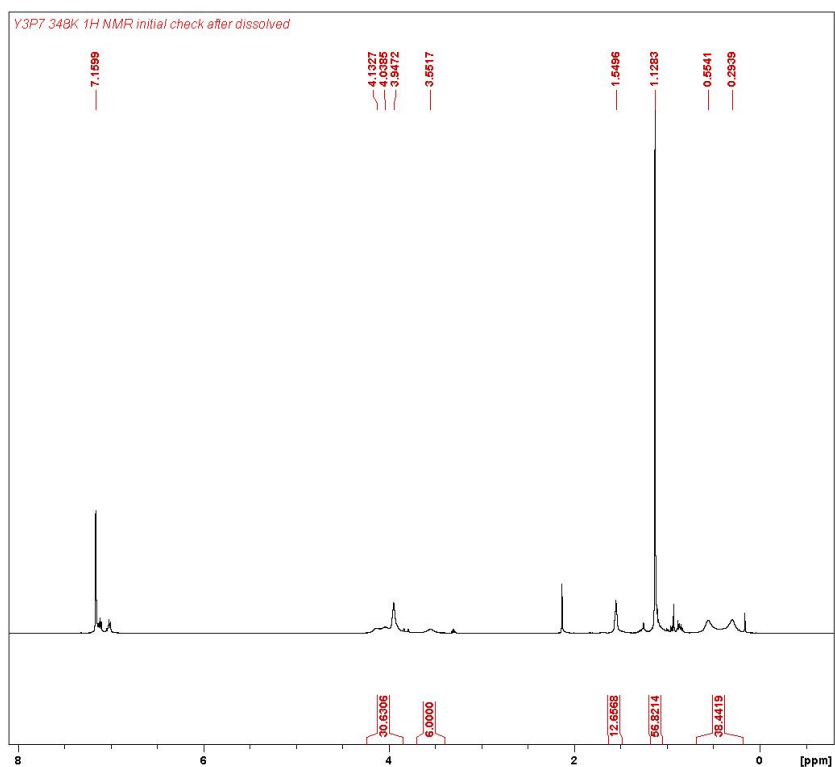

$^{13}\text{C}$  NMR spectrum of  $\text{Y}_3\text{P}_7$  (126 MHz,  $\text{C}_6\text{D}_6$ , 75°C)

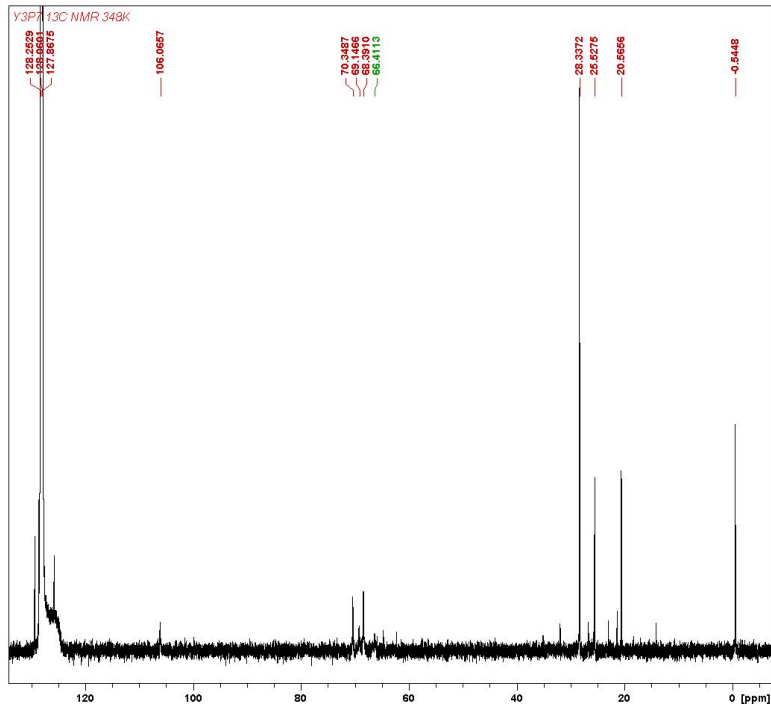

$^{31}\text{P}$  NMR spectrum of  $\text{Y}_3\text{P}_7$  (122 MHz,  $\text{C}_6\text{D}_6$ , 25°C)

*Note:* The low solubility of  $\text{Y}_3\text{P}_7$  in  $\text{C}_6\text{D}_6$  prevents getting a high resolution  $^{31}\text{P}$  NMR spectrum. An attempt to use  $d_8$ -THF as a solvent resulted in the decomposition of  $\text{Y}_3\text{P}_7$ .

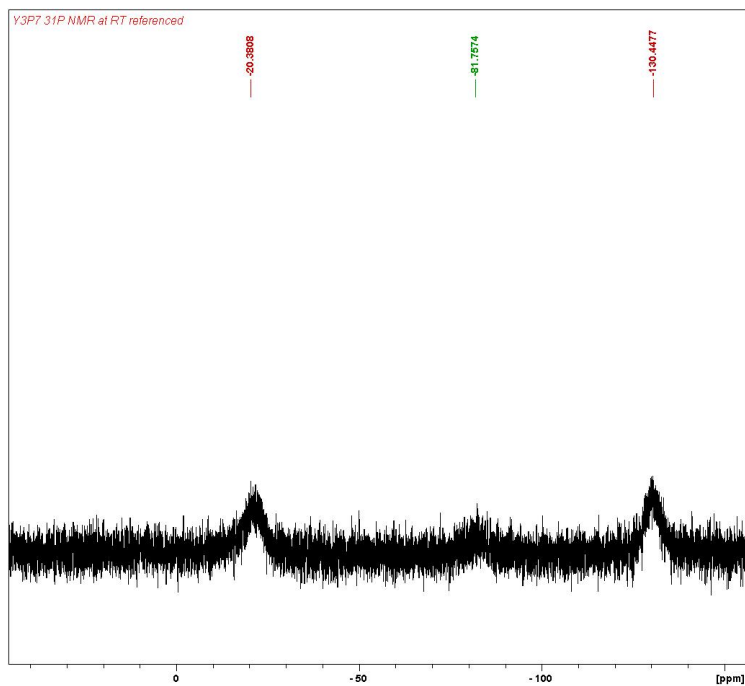

$^1\text{H}$  NMR spectrum of the reaction mixture of  $\text{Sc}_3\text{P}_7$  and excess  $\text{Me}_3\text{SiI}$  after 23 h at  $50\text{ }^\circ\text{C}$  (300 MHz,  $\text{C}_6\text{D}_6$ ,  $25\text{ }^\circ\text{C}$ )

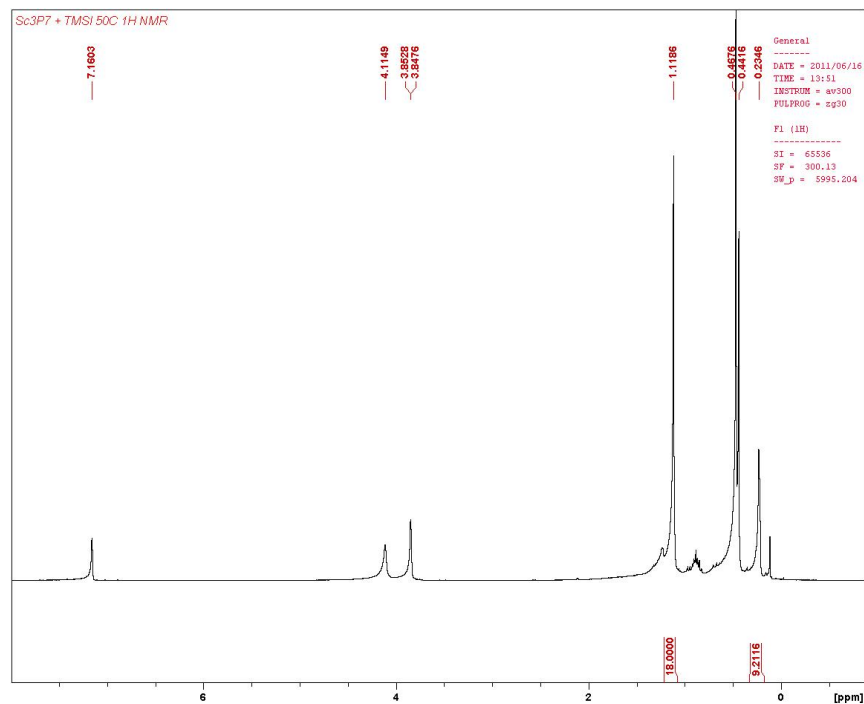

$^{31}\text{P}$  NMR spectrum of the reaction mixture of  $\text{Sc}_3\text{P}_7$  and excess  $\text{Me}_3\text{SiI}$  after 8 h at  $50\text{ }^\circ\text{C}$  (122 MHz,  $\text{C}_6\text{D}_6$ ,  $25\text{ }^\circ\text{C}$ )

*Note:* the small, broad peaks belong to unreacted  $\text{Sc}_3\text{P}_7$ .

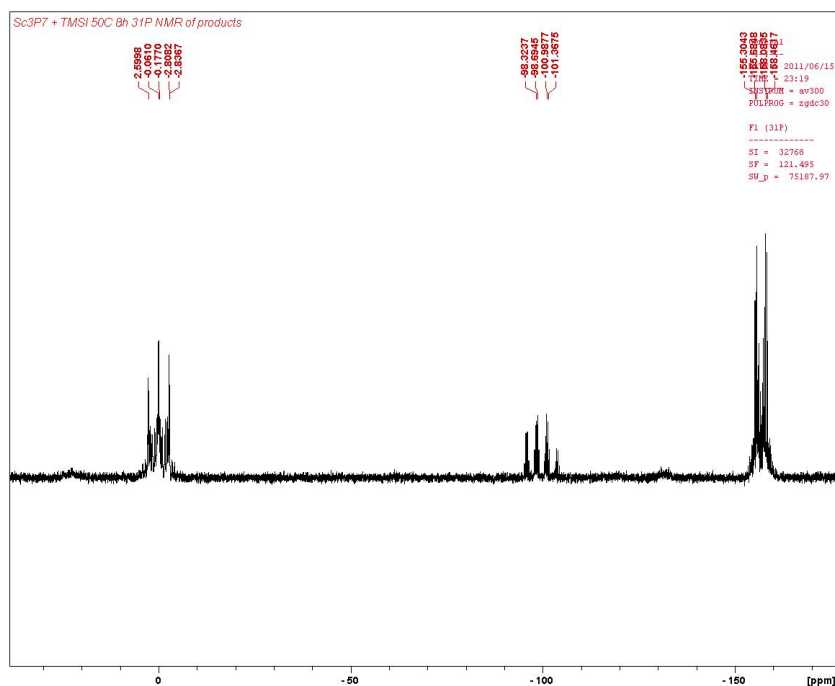

$^1\text{H}$  NMR spectrum of the reaction mixture of  $\text{Y}_3\text{P}_7$  and excess  $\text{Me}_3\text{SiI}$  after 9 h at 25 °C (300 MHz,  $\text{C}_6\text{D}_6$ , 25 °C)

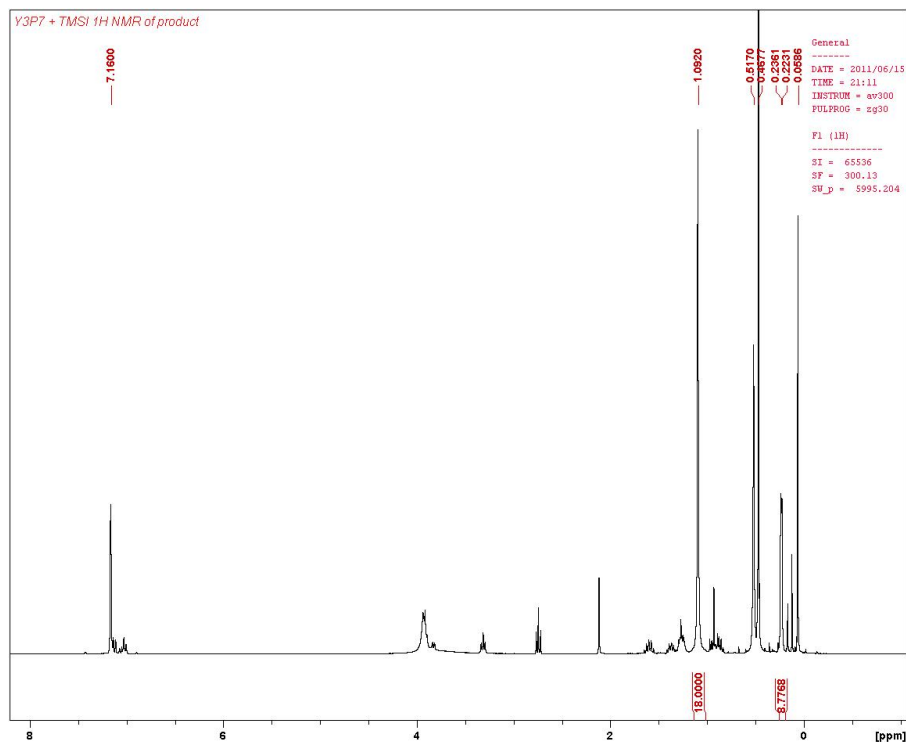

$^{31}\text{P}$  NMR spectrum of the reaction mixture of  $\text{Y}_3\text{P}_7$  and excess  $\text{Me}_3\text{SiI}$  after 9 h at 25 °C (122 MHz,  $\text{C}_6\text{D}_6$ , 25 °C)

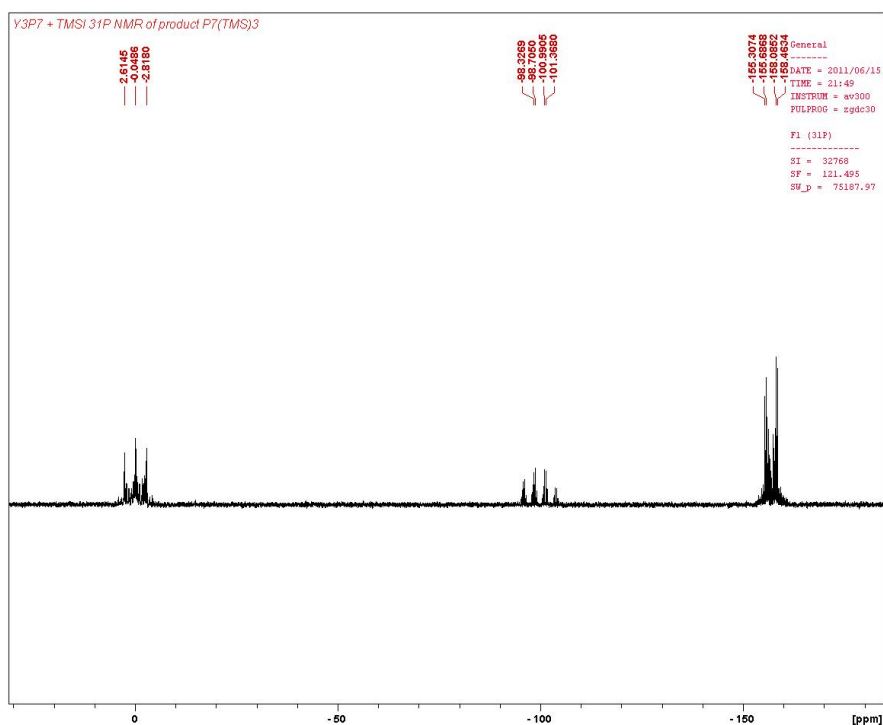

### 3. Variable Temperature $^1\text{H}$ NMR spectra of Y-anth (500 MHz, $\text{C}_7\text{D}_8$ )

**R = Restricted Rotation**    **C = Coalescence**    **F = Free Rotation**

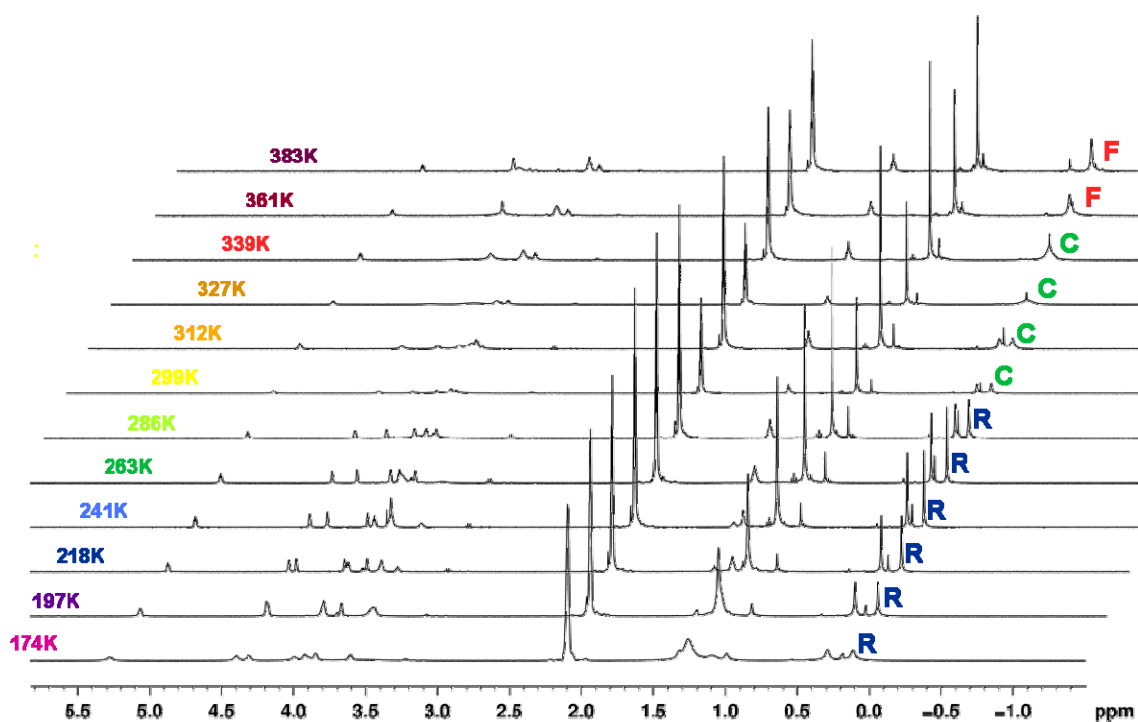

## 4. Simulation of $^{31}\text{P}$ NMR spectra

Note: The simulation was performed with Topspin<sup>TM</sup> software.

**Sc<sub>4</sub>P<sub>8</sub>**: AA'A"A'MM'M"M'" spin system

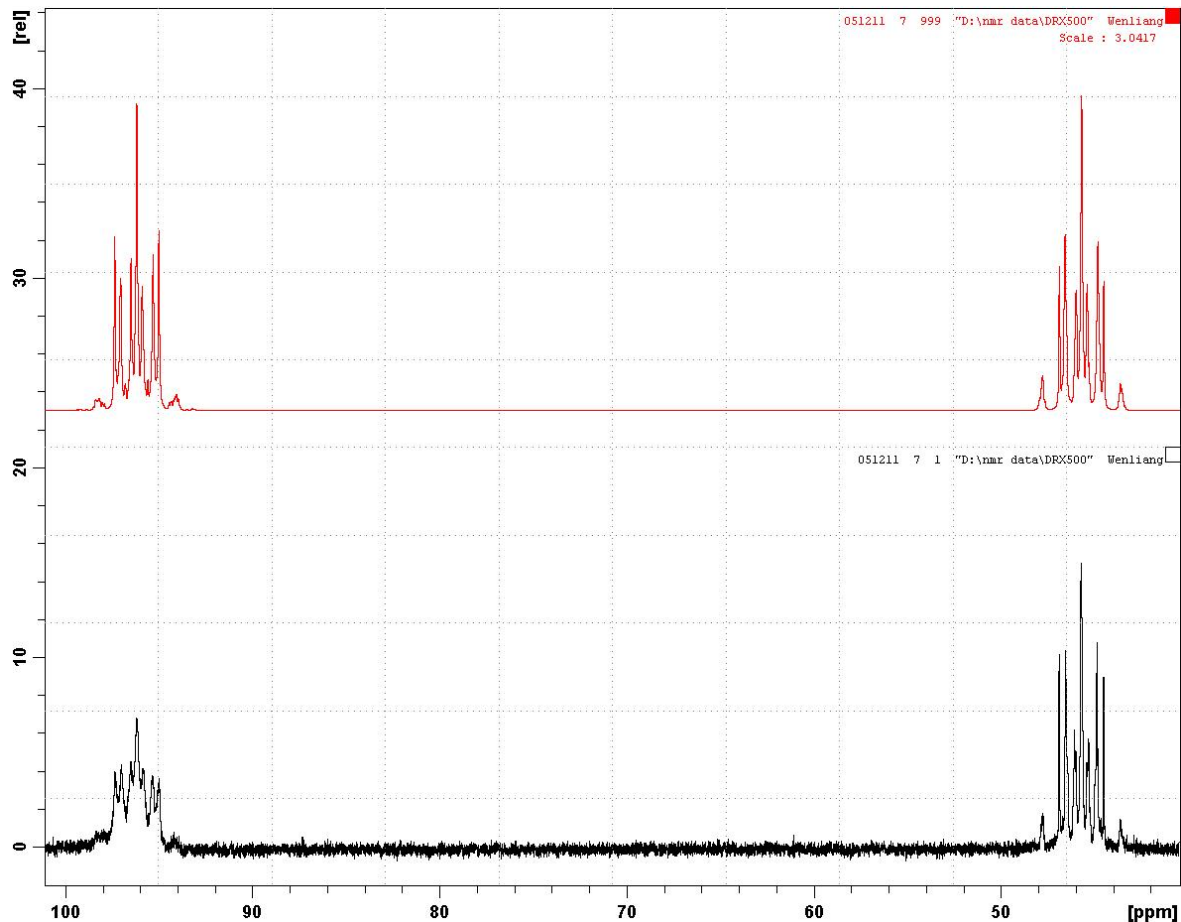

Top: simulated spectrum; bottom: experimental spectrum.  $^1J_{\text{AM}}$  is an abbreviation for  $^1J_{\text{PA-PM}}$  which was also applied to other  $J$  values for **Sc<sub>4</sub>P<sub>8</sub>**, **Sc<sub>3</sub>P<sub>7</sub>** and **Y<sub>3</sub>P<sub>7</sub>**.

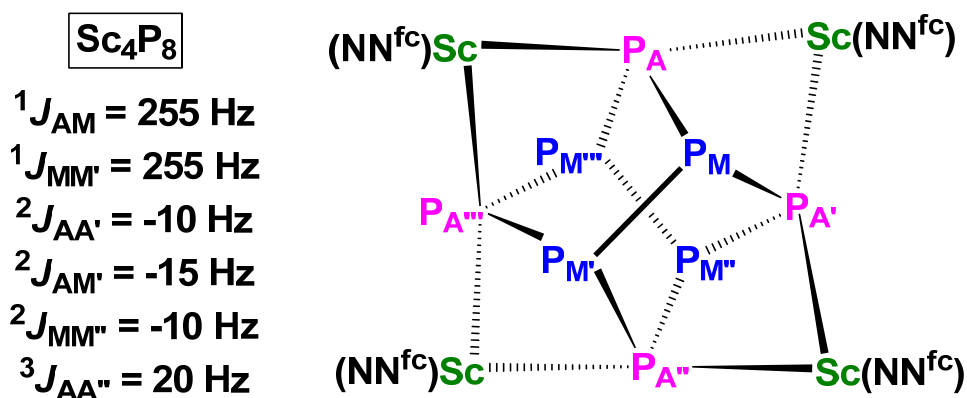

**Sc<sub>3</sub>P<sub>7</sub>: AA'A"MM'M"X spin system**

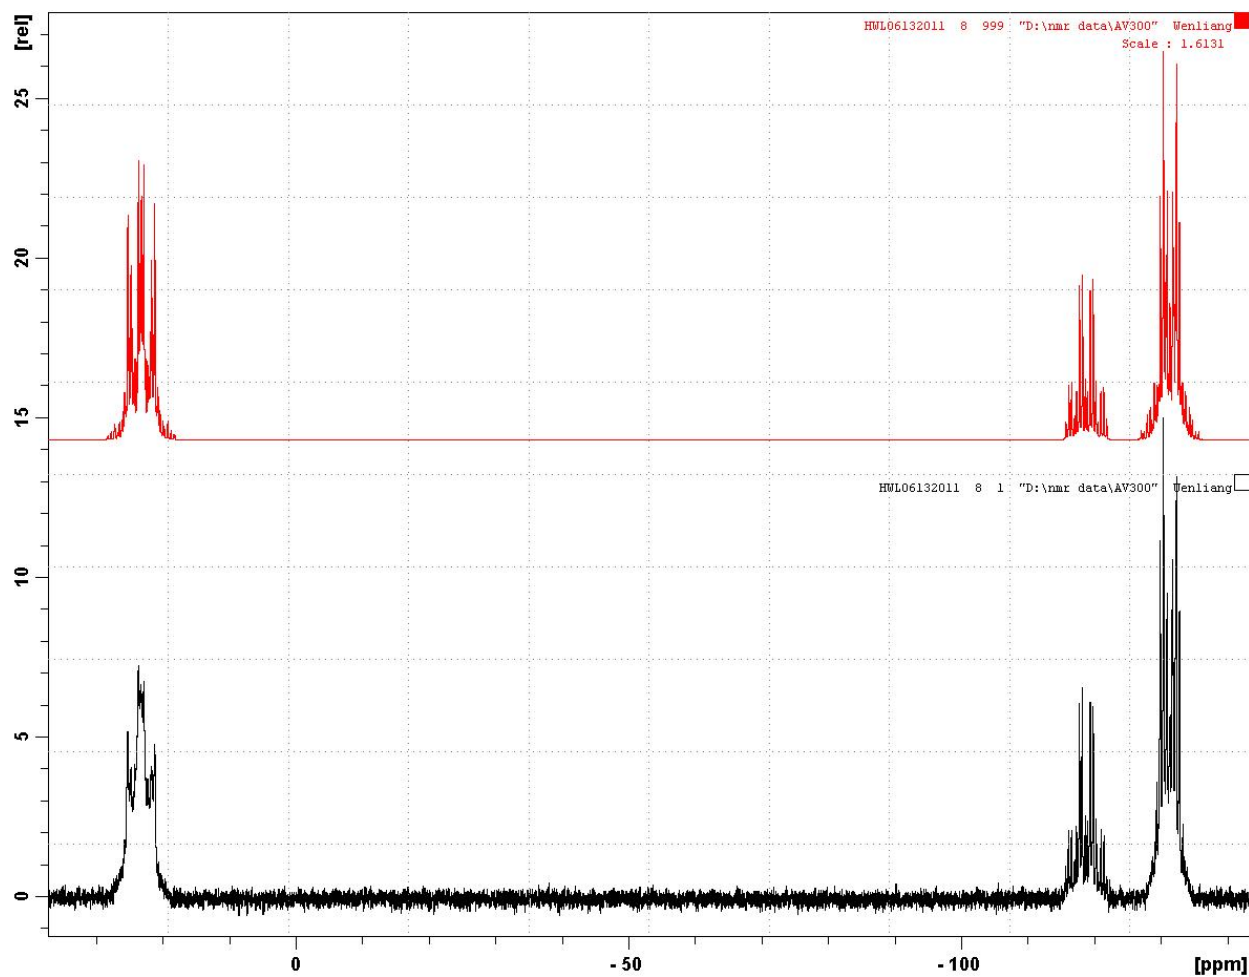

Top: simulated spectrum; bottom: experimental spectrum.

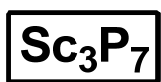

$$^1J_{AM} = 320 \text{ Hz}$$

$$^1J_{MM'} = 230 \text{ Hz}$$

$$^1J_{AX} = 195 \text{ Hz}$$

$$^2J_{AA'} = -55 \text{ Hz}$$

$$^2J_{AM'} = -12 \text{ Hz}$$

$$^2J_{MX} = -53 \text{ Hz}$$

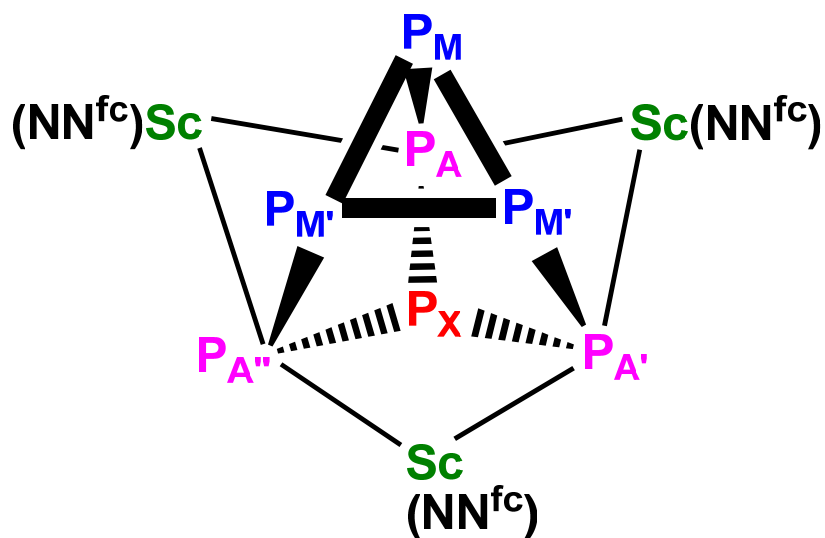

# $\text{Y}_3\text{P}_7$ : $\text{AA}'\text{A}''\text{MM}'\text{M}''\text{X}$ ( $\text{YY}'\text{Y}''$ ) spin system

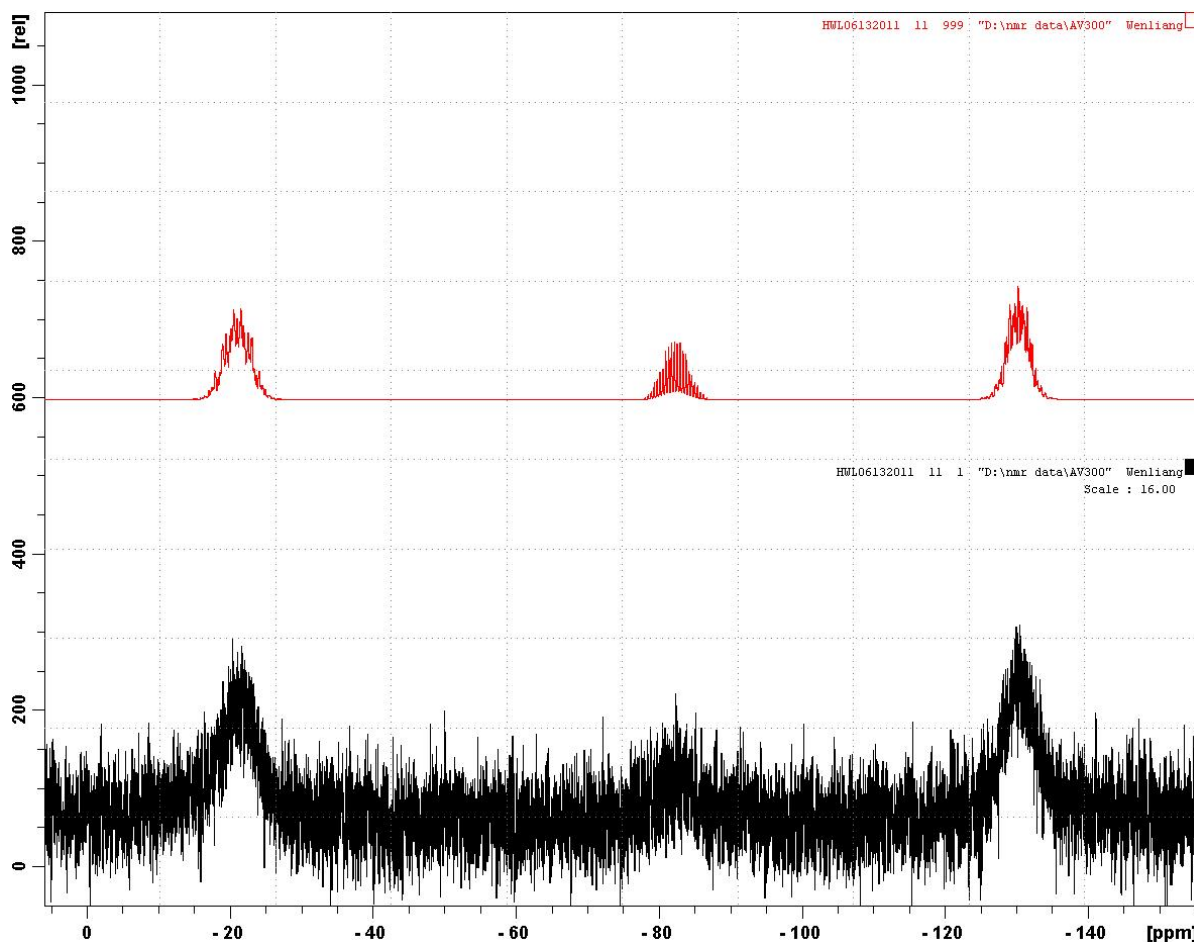

Top: simulated spectrum; bottom: experimental spectrum (see previous note for low resolution explanation). Because of the low resolution, the  $J_{\text{PP}}$  values were adopted from  $\text{Sc}_3\text{P}_7$  and only  $J_{\text{YP}}$  values were tuned to simulate the spectrum.

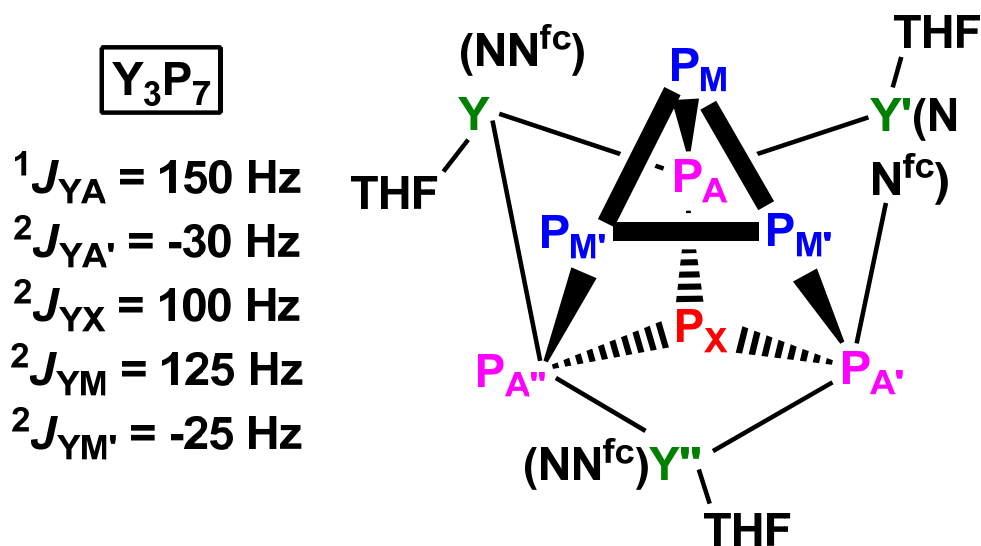



## 5. X-ray crystallography

### YI(THF)<sub>2</sub>

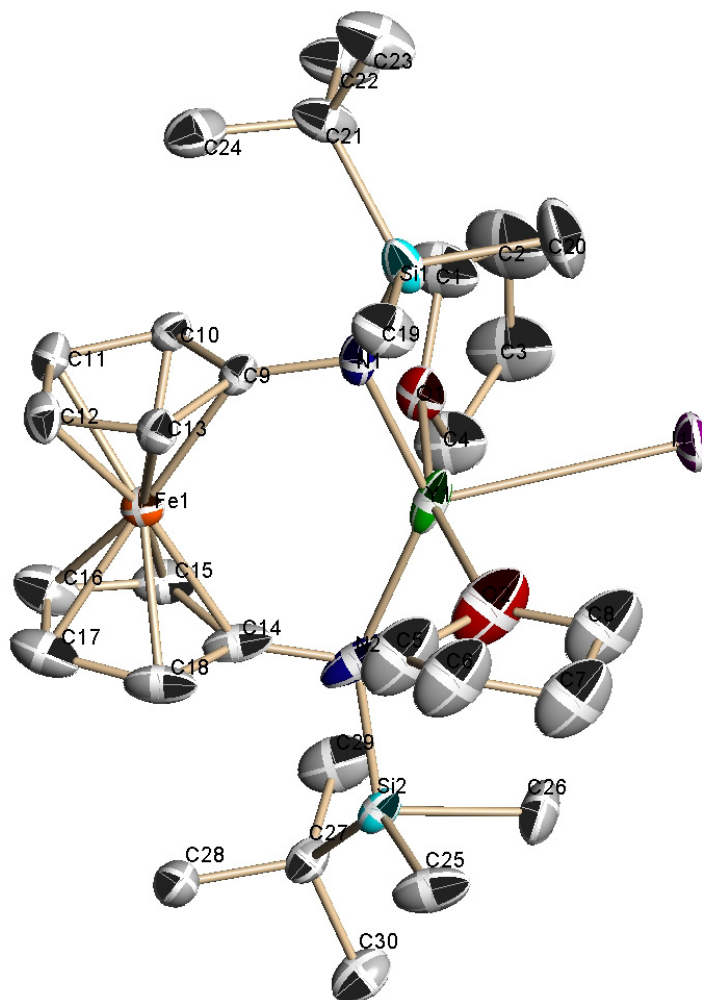

**Figure SX1.** Thermal-ellipsoid (50% probability) representation of **YI(THF)<sub>2</sub>**. Hydrogen atoms and disordered counterparts were omitted for clarity.

Single crystals were grown from a diluted diethyl ether solution layered with pentane after storing at -35 °C. The iodide and one of the silyl groups were disordered; this disorder was modeled. A total of 17684 reflections ( $-15 \leq h \leq 15$ ,  $-16 \leq k \leq 16$ ,  $-23 \leq l \leq 23$ ) were collected at  $T = 100(2)$  K with  $2\theta_{\max} = 61.50^\circ$ , of which 9851 were unique. The residual peak and hole electron density were 2.23 and  $-2.62 \text{ e}\text{\AA}^{-3}$ . The least-squares refinement converged normally with residuals of  $R_1 = 0.0516$  and  $\text{GOF} = 1.043$ . Crystal and refinement data for **YI(THF)<sub>2</sub>**: formula  $\text{C}_{30}\text{H}_{54}\text{N}_2\text{Si}_2\text{FeYIO}_2$ , space group  $P-1$ ,  $a = 11.140(3)$ ,  $b = 11.596(3)$ ,  $c = 16.156(5)$ ,  $\alpha = 101.325(3)$ ,  $\beta = 92.432(3)$ ,  $\gamma = 118.211(2)^\circ$ ,  $V = 1781.1(8) \text{ \AA}^3$ ,  $Z = 2$ ,  $\mu = 2.989 \text{ mm}^{-1}$ ,  $F(000) = 820$ ,  $R_1 = 0.0655$  and  $wR_2 = 0.1329$  (based on all 9851 data,  $I > 2\sigma(I)$ ).

## Y-naph

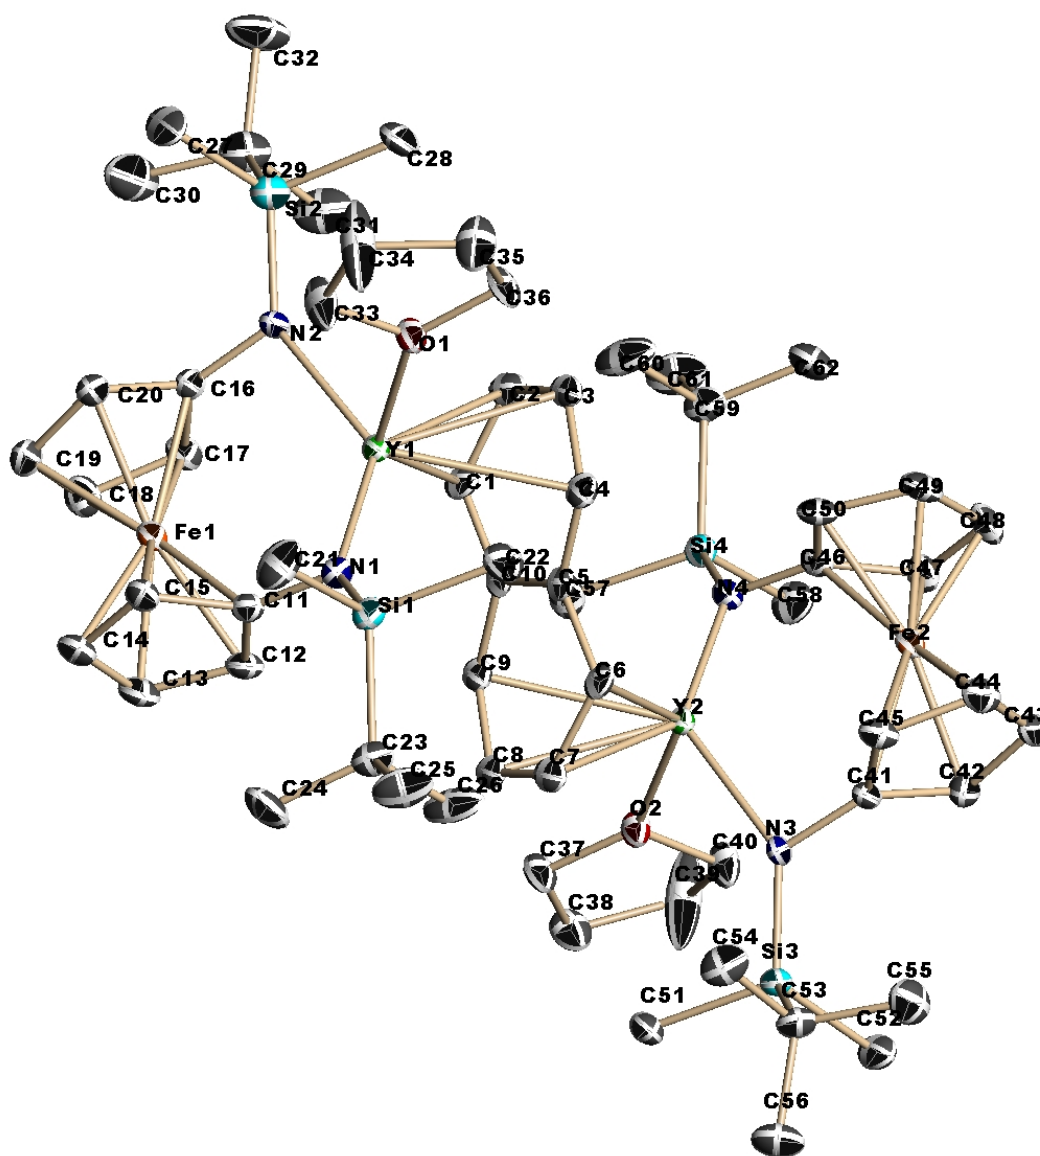

**Figure SX2.** Thermal-ellipsoid (50% probability) representation of **Y-naph**. Hydrogen and solvent atoms were omitted for clarity.

Single crystals suitable for X-ray diffraction were grown from a concentrated diethyl ether solution stored at  $-35\text{ }^{\circ}\text{C}$ . A total of 69888 reflections ( $-25 \leq h \leq 25$ ,  $-13 \leq k \leq 13$ ,  $-33 \leq l \leq 32$ ) were collected at  $T = 100(2)\text{ K}$  with  $2\theta_{\text{max}} = 49.00^{\circ}$ , of which 11705 were unique. The residual peak and hole electron density were  $3.75$  and  $-1.16\text{ e}\text{\AA}^{-3}$ . The least-squares refinement converged normally with residuals of  $R_1 = 0.0473$  and  $\text{GOF} = 1.083$ . Crystal and refinement data for **Y-naph**: formula  $\text{C}_{62}\text{H}_{100}\text{N}_4\text{Si}_4\text{Fe}_2\text{Y}_2\text{O}_2(\text{C}_7\text{H}_8)$ , space group  $P2_1/n$ ,  $a = 22.149(5)$ ,  $b = 11.297(2)$ ,  $c = 28.352(6)$ ,  $\beta = 94.925(2)^{\circ}$ ,  $V = 7068(3)\text{ \AA}^3$ ,  $Z = 4$ ,  $\mu = 2.141\text{ mm}^{-1}$ ,  $F(000) = 3008$ ,  $R_1 = 0.0655$  and  $wR_2 = 0.1226$  (based on all 11705 data,  $I > 2\sigma(I)$ ).

# Sc<sub>4</sub>P<sub>8</sub>

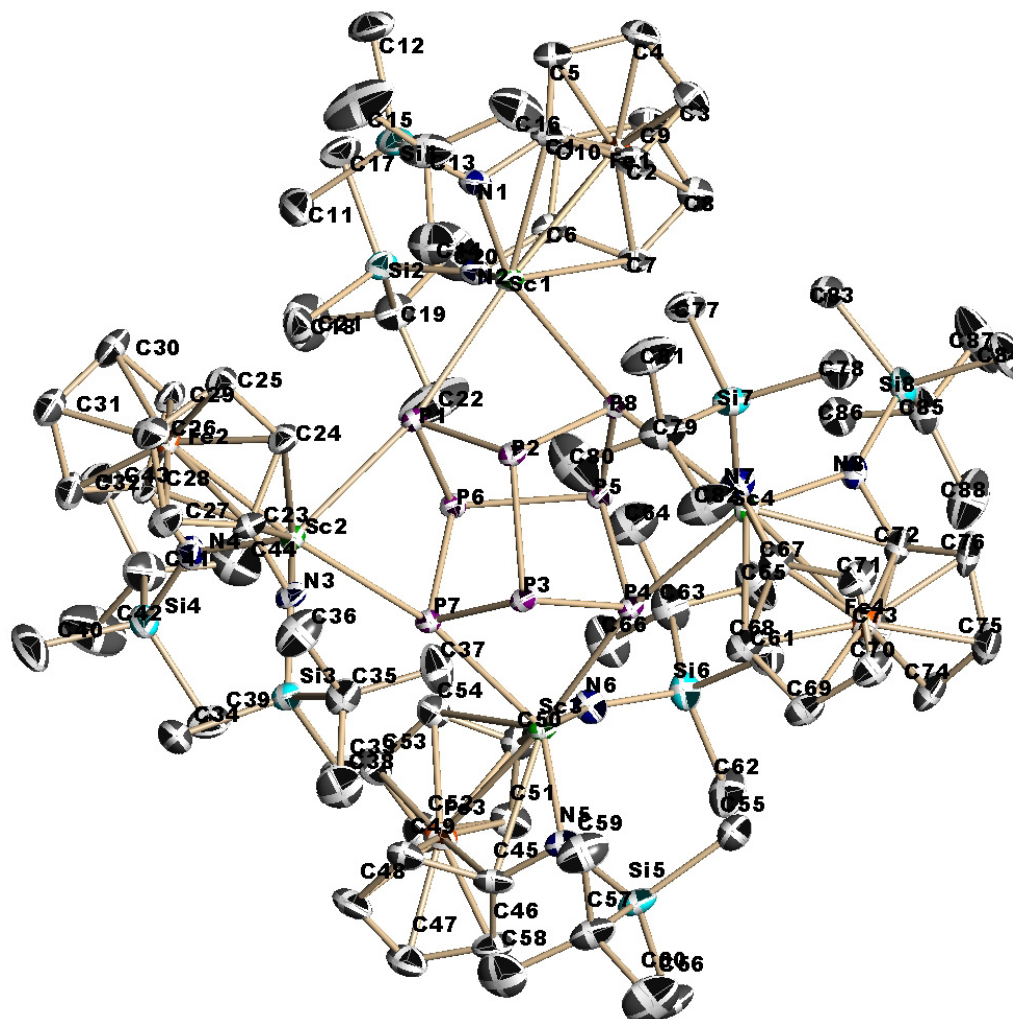

**Figure SX3.** Thermal-ellipsoid (50% probability) representation of **Sc<sub>4</sub>P<sub>8</sub>**. Hydrogen and solvent atoms were omitted for clarity. Selected distances [Å] and angles [°]: P1-P2 2.203(2), P1-P6 2.205(2), P2-P3 2.306 (2), P2-P8 2.206(2), P3-P4 2.207(2), P3-P7 2.207(2), P4-P5 2.198(2), P5-P6 2.308(2), P5-P8 2.201(2), P6-P7 2.205(2), Sc1-P1 2.780(2), Sc1-P8 2.762(2), Sc1-N1 2.037(6), Sc1-N2 2.065(5), Sc1-Fe1 2.792(2), Sc2-Fe2 2.823(2), Sc3-Fe3 2.813(2), Sc4-Fe4 2.791(2), P1-Sc1-P8 70.1(1), P1-Sc1-Fe1 175.2(1), P8-Sc1-Fe1 106.3(1), P2-P1-P6 98.5(1), P1-P2-P8 92.4(1), P1-P2-P3 101.8(1).

Single crystals suitable for X-ray diffraction were grown from a toluene solution layered with hexanes stored at -35 °C for a week. Some of the *t*-butyl groups are slightly disordered; this disorder was not modelled. A total of 56284 reflections ( $-20 \leq h \leq 21$ ,  $-22 \leq k \leq 22$ ,  $-35 \leq l \leq 35$ ) were collected at  $T = 100(2)$  K with  $2\theta_{\max} = 57.35^\circ$ , of which 30396 were unique. The residual peak and hole electron density were 1.51 and -0.92 e Å<sup>-3</sup>. The least-squares refinement converged normally with residuals of  $R_1 = 0.0602$  and  $\text{GOF} = 1.005$ . Crystal and refinement data for **Sc<sub>4</sub>P<sub>8</sub>**: formula C<sub>88</sub>H<sub>152</sub>N<sub>8</sub>Si<sub>8</sub>Fe<sub>4</sub>Sc<sub>4</sub>P<sub>8</sub> 2(C<sub>7</sub>H<sub>3</sub>), space group *P*-1,  $a = 15.581(3)$ ,  $b = 16.495(3)$ ,  $c = 26.449(6)$ ,  $\alpha = 80.486(2)$ ,  $\beta = 79.606(2)$ ,  $\gamma = 67.127(2)^\circ$ ,  $V = 6127(2)$  Å<sup>3</sup>,  $Z = 2$ ,  $\mu = 0.894$  mm<sup>-1</sup>,  $F(000) = 2492$ ,  $R_1 = 0.0602$  and  $wR_2 = 0.1698$  (based on all 30396 data,  $I > 2\sigma(I)$ ).

## Sc<sub>3</sub>P<sub>7</sub>

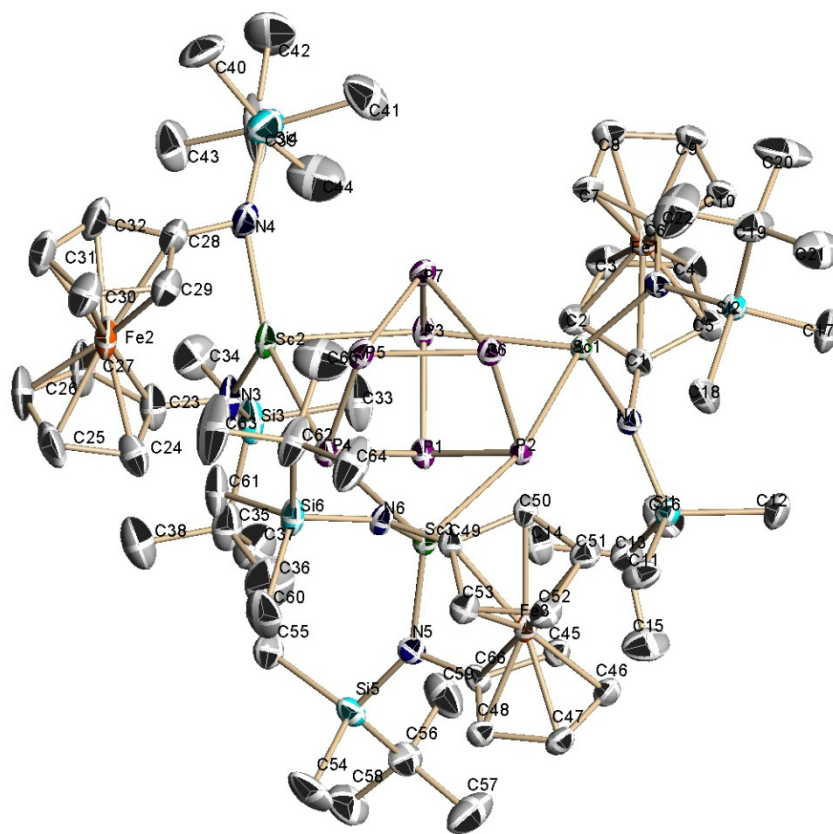

**Figure SX4.** Thermal-ellipsoid (50% probability) representation of **Sc<sub>3</sub>P<sub>7</sub>**. Hydrogen atoms were omitted for clarity. Selected distances [Å] and angles [°]: P1-P2 2.197(2), P1-P3 2.204(2), P1-P4 2.196(2), P2-P6 2.197(2), P3-P7 2.197(2), P4-P5 2.194(2), P5-P6 2.226(2), P5-P7 2.234(2), P6-P7 2.228(2), Sc1-P2 2.730(2), Sc1-P3 2.747(2), Sc1-N1 2.028(4), Sc1-N2 2.072(4), Sc1-Fe1 2.803(1), Sc2-Fe2 2.788(1), Sc3-Fe3 2.824(1), P2-P1-P3 99.9(1), P1-P2-P6 100.7(1), P5-P6-P2 103.9(1), P5-P6-P7 60.2(1), N1-Sc1-N2 116.8(2), P2-Sc1-P3 75.9(1), P2-Sc1-Fe1 179.1(1), P3-Sc1-Fe1 104.1(1).

Single crystals suitable for X-ray diffraction were grown from a concentrated hexanes solution with several drops of toluene stored at -35 °C for several days. One of the *t*-butyl groups is disordered and some additional electron density is found that is equidistant from the tertiary carbon, silicon, and nitrogen. As a consequence, it was difficult to get a stable refinement when this electron density was refined as a counterpart to either of them. The unit cell contains large accessible voids; solvent molecules could not be modeled to fit this space (it is possible that some solvent was lost during crystal handling) and the program SQUEEZE was used. A total of 48996 reflections ( $-17 \leq h \leq 17$ ,  $-17 \leq k \leq 17$ ,  $-27 \leq l \leq 27$ ) were collected at  $T = 100(2)$  K with  $2\theta_{\text{max}} = 47.80^\circ$ , of which 15016 were unique. The residual peak and hole electron density were 5.11 and -1.13 eÅ<sup>-3</sup>. The least-squares refinement converged normally with residuals of  $R_1 = 0.0577$  and  $\text{GOF} = 1.071$ . Crystal and refinement data for **Sc<sub>3</sub>P<sub>7</sub>**: formula C<sub>66</sub>H<sub>114</sub>N<sub>6</sub>Si<sub>6</sub>Fe<sub>3</sub>Sc<sub>3</sub>P<sub>7</sub>, space group *P*-1,  $a = 15.3797(15)$ ,  $b = 15.4112(15)$ ,  $c = 24.293(2)$ ,  $\alpha = 101.293(1)$ ,  $\beta = 93.402(1)$ ,  $\gamma = 118.660(1)^\circ$ ,  $V = 4875.4(8)$  Å<sup>3</sup>,  $Z = 2$ ,  $\mu = 0.854$  mm<sup>-1</sup>,  $F(000) = 1764$ ,  $R_1 = 0.0683$  and  $wR_2 = 0.1659$  (based on all 15016 data,  $I > 2\sigma(I)$ ).



# Y<sub>3</sub>P<sub>7</sub>

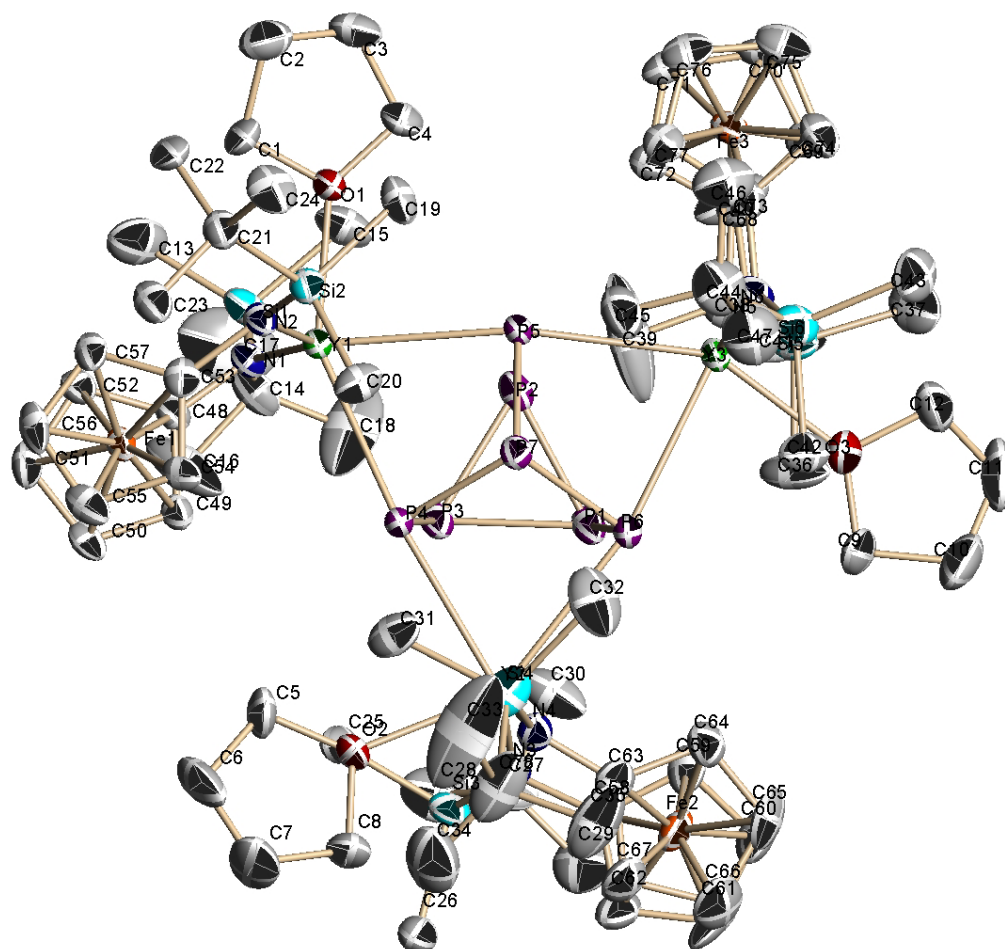

**Figure SX5.** Thermal-ellipsoid (50% probability) representation of Y<sub>3</sub>P<sub>7</sub>. Hydrogen atoms were omitted for clarity. Selected distances [Å] and angles [°]: P1-P6 2.176(3), P1-P2 2.246(3), P1-P3 2.236(3), P2-P5 2.182(3), P2-P3 2.231(3), P3-P4 2.175(3), P4-P7 2.187(3), P5-P7 2.188(3), P6-P7 2.186(3), Y1-P4 2.910(2), Y1-P5 2.952(2), Y1-N1 2.204(6), Y1-N2 2.223(6), Y1-O1 2.358(5), Y1-Fe1 3.243(1), Y2-Fe2 3.262(1), Y3-Fe3 3.337(1), P2-P1-P3 59.7(1), P2-P1-P6 105.7(1), P4-P7-P5 99.2(1), N1-Y1-N2 130.4(2), P4-Y1-P5 69.3(1), P5-Y1-O1 82.3(1), O1-Y1-Fe1 121.5(1), Fe1-Y1-P4 86.6(1).

Single crystals suitable for X-ray diffraction were grown from a toluene solution layered with hexanes. Some of the *t*-butyl groups are disordered; this disorder was not modeled. The unit cell contains large accessible voids; solvent molecules could not be modeled to fit this space (it is possible that some solvent was lost during crystal handling) and the program SQUEEZE was used. A total of 104336 reflections ( $-60 \leq h \leq 62$ ,  $-28 \leq k \leq 28$ ,  $-31 \leq l \leq 31$ ) were collected at  $T = 100(2)$  K with  $2\theta_{\max} = 56.67^\circ$ , of which 28887 were unique. The residual peak and hole electron density were 1.47 and  $-1.68 \text{ eÅ}^{-3}$ . The least-squares refinement converged normally with residuals of  $R_1 = 0.0850$  and  $\text{GOF} = 1.036$ . Crystal and refinement data for Y<sub>3</sub>P<sub>7</sub>: formula C<sub>78</sub>H<sub>138</sub>N<sub>6</sub>Si<sub>6</sub>Fe<sub>3</sub>Y<sub>3</sub>P<sub>7</sub>O<sub>3</sub>, space group C2/c,  $a = 46.711(11)$ ,  $b = 21.615(5)$ ,  $c = 23.922(6)$ ,  $\beta = 104.938(2)^\circ$ ,  $V = 23337(10) \text{ Å}^3$ ,  $Z = 8$ ,  $\mu = 2.033 \text{ mm}^{-1}$ ,  $F(000) = 8448$ ,  $R_1 = 0.1365$  and  $wR_2 = 0.2697$  (based on all 28887 data,  $I > 2\sigma(I)$ ).

## 6. DFT calculations

**Table SX1.** Comparison of metrical parameters from calculated (ADF) and X-ray crystal structures (experimental) for  $\text{Sc}_4\text{P}_8$ ,  $\text{Sc}_3\text{P}_7$ , and  $\text{Y}_3\text{P}_7$ .

| Complex                                                                             | Parameter                          | ADF    | Experimental |
|-------------------------------------------------------------------------------------|------------------------------------|--------|--------------|
| 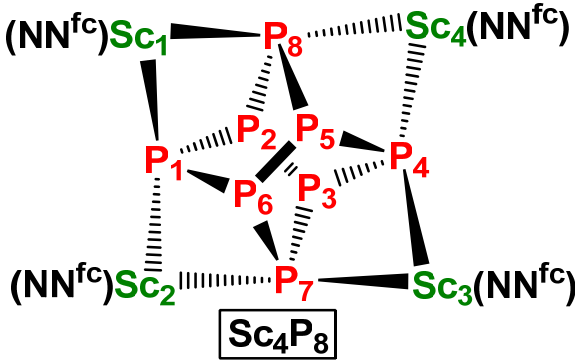   | P1–P2                              | 2.23 Å | 2.20 Å       |
|                                                                                     | P1–P6                              | 2.23 Å | 2.20 Å       |
|                                                                                     | P2–P3                              | 2.34 Å | 2.31 Å       |
|                                                                                     | P2–P8                              | 2.23 Å | 2.21 Å       |
|                                                                                     | P3–P4                              | 2.23 Å | 2.21 Å       |
|                                                                                     | P3–P7                              | 2.23 Å | 2.21 Å       |
|                                                                                     | P4–P5                              | 2.23 Å | 2.20 Å       |
|                                                                                     | P5–P6                              | 2.37 Å | 2.31 Å       |
|                                                                                     | P5–P8                              | 2.23 Å | 2.20 Å       |
|                                                                                     | P6–P7                              | 2.23 Å | 2.20 Å       |
|                                                                                     | Sc1–P1                             | 2.84 Å | 2.78 Å       |
|                                                                                     | Sc1–P8                             | 2.83 Å | 2.76 Å       |
|                                                                                     | Sc1–N <sub>fc</sub>                | 2.08 Å | 2.04 Å       |
|                                                                                     | Sc1–N <sub>fc</sub>                | 2.10 Å | 2.06 Å       |
|                                                                                     | Sc1–Fe1                            | 2.81 Å | 2.79 Å       |
|                                                                                     | Sc2–Fe2                            | 2.83 Å | 2.82 Å       |
|                                                                                     | Sc3–Fe3                            | 2.83 Å | 2.81 Å       |
|                                                                                     | Sc4–Fe4                            | 2.83 Å | 2.79 Å       |
|                                                                                     | P1Sc1P8                            | 69.5°  | 70.1°        |
|                                                                                     | P1Sc1Fe1                           | 172.7° | 175.2°       |
|                                                                                     | P8Sc1Fe1                           | 105.1° | 106.3°       |
|                                                                                     | P2P1P6                             | 99.2°  | 98.5°        |
|                                                                                     | P1P2P8                             | 92.6°  | 92.4°        |
|                                                                                     | P1P2P3                             | 101.1° | 101.8°       |
|  | P1–P2                              | 2.23 Å | 2.20 Å       |
|                                                                                     | P1–P3                              | 2.24 Å | 2.20 Å       |
|                                                                                     | P1–P4                              | 2.24 Å | 2.20 Å       |
|                                                                                     | P2–P6                              | 2.23 Å | 2.20 Å       |
|                                                                                     | P3–P7                              | 2.23 Å | 2.20 Å       |
|                                                                                     | P4–P5                              | 2.23 Å | 2.19 Å       |
|                                                                                     | P5–P6                              | 2.27 Å | 2.23 Å       |
|                                                                                     | P5–P7                              | 2.27 Å | 2.23 Å       |
|                                                                                     | P6–P7                              | 2.27 Å | 2.23 Å       |
|                                                                                     | Sc1–P2                             | 2.83 Å | 2.73 Å       |
|                                                                                     | Sc1–P3                             | 2.83 Å | 2.75 Å       |
|                                                                                     | Sc1–N <sub>fc</sub>                | 2.07 Å | 2.03 Å       |
|                                                                                     | Sc1–N <sub>fc</sub>                | 2.11 Å | 2.07 Å       |
|                                                                                     | Sc1–Fe1                            | 2.83 Å | 2.80 Å       |
|                                                                                     | Sc2–Fe2                            | 2.84 Å | 2.79 Å       |
|                                                                                     | Sc3–Fe3                            | 2.84 Å | 2.82 Å       |
|                                                                                     | P2Sc1P3                            | 74.4°  | 75.9°        |
|                                                                                     | P2Sc1Fe1                           | 179.1° | 179.1°       |
|                                                                                     | P3Sc1Fe1                           | 105.4° | 104.1°       |
|                                                                                     | P2P1P3                             | 99.8°  | 99.9°        |
|                                                                                     | P1P2P6                             | 100.6° | 100.7°       |
|                                                                                     | P5P6P2                             | 104.5° | 103.9°       |
|                                                                                     | P5P6P7                             | 60.1°  | 60.2°        |
|                                                                                     | N <sub>fc</sub> Sc1N <sub>fc</sub> | 118.0° | 116.8°       |

|                                       |                                   |        |        |
|---------------------------------------|-----------------------------------|--------|--------|
|                                       | P1–P2                             | 2.28 Å | 2.25 Å |
|                                       | P1–P6                             | 2.22 Å | 2.18 Å |
|                                       | P1–P3                             | 2.28 Å | 2.24 Å |
|                                       | P2–P5                             | 2.22 Å | 2.18 Å |
|                                       | P2–P3                             | 2.28 Å | 2.23 Å |
|                                       | P3–P4                             | 2.22 Å | 2.17 Å |
|                                       | P4–P7                             | 2.23 Å | 2.19 Å |
|                                       | P5–P7                             | 2.23 Å | 2.19 Å |
|                                       | P6–P7                             | 2.23 Å | 2.19 Å |
|                                       | Y1–P4                             | 3.01 Å | 2.91 Å |
|                                       | Y1–P5                             | 3.03 Å | 2.95 Å |
|                                       | Y1–N <sub>fc</sub>                | 2.24 Å | 2.20 Å |
|                                       | Y1–N <sub>fc</sub>                | 2.25 Å | 2.22 Å |
|                                       | Y1–O1                             | 2.48 Å | 2.36 Å |
|                                       | Y1–Fe1                            | 3.41 Å | 3.24 Å |
|                                       | Y2–Fe2                            | 3.43 Å | 3.26 Å |
|                                       | Y3–Fe3                            | 3.42 Å | 3.34 Å |
|                                       | P2P1P3                            | 59.9°  | 59.7°  |
|                                       | P2P1P6                            | 104.3° | 105.7° |
|                                       | P4P7P5                            | 100.0° | 99.2°  |
| <div>Y<sub>3</sub>P<sub>7</sub></div> | P4Y1P5                            | 68.8°  | 69.3°  |
|                                       | P5Y1O1                            | 81.9°  | 82.3°  |
|                                       | O1Y1Fe1                           | 116.8° | 121.5° |
|                                       | P4Y1Fe1                           | 92.6°  | 86.6°  |
|                                       | N <sub>fc</sub> Y1N <sub>fc</sub> | 127.1° | 130.4° |

## Selected molecular orbitals for $\text{Sc}_4\text{P}_8$

### HOMO

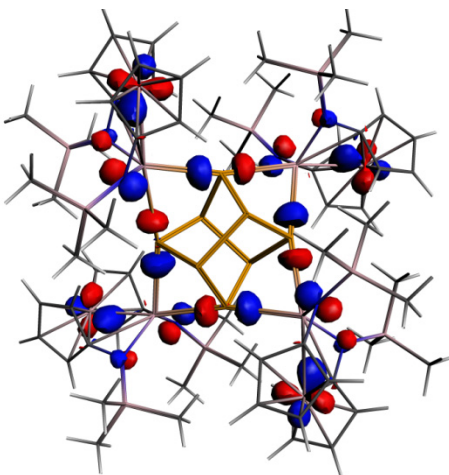

### HOMO-1

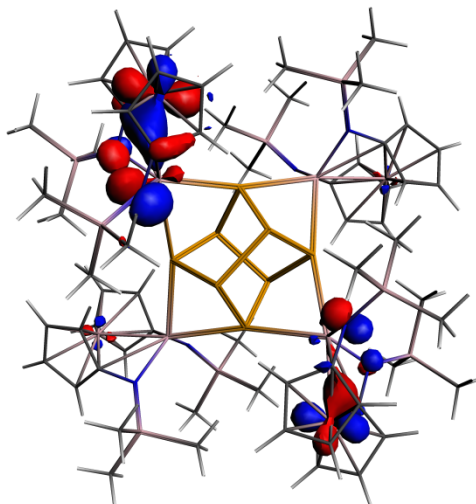

### HOMO-8

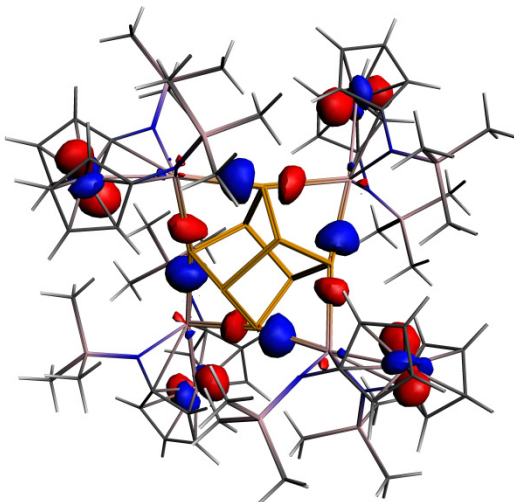



### HOMO-12

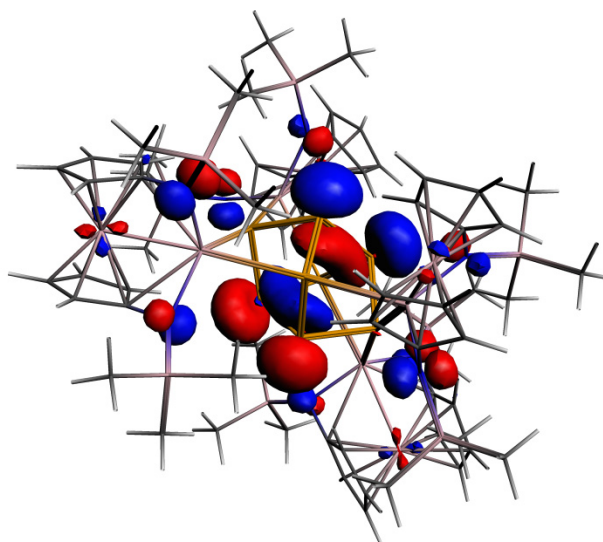

### HOMO-15

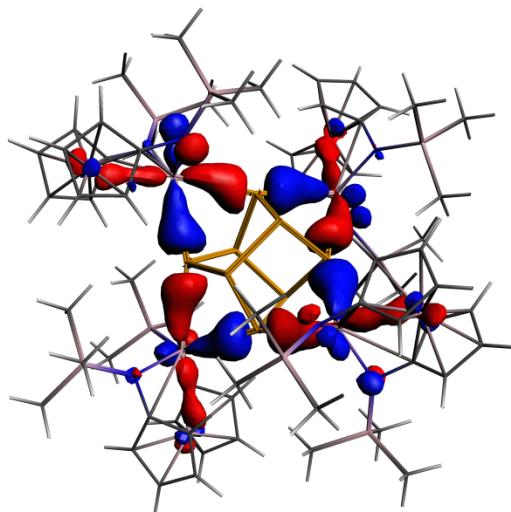

### HOMO-20

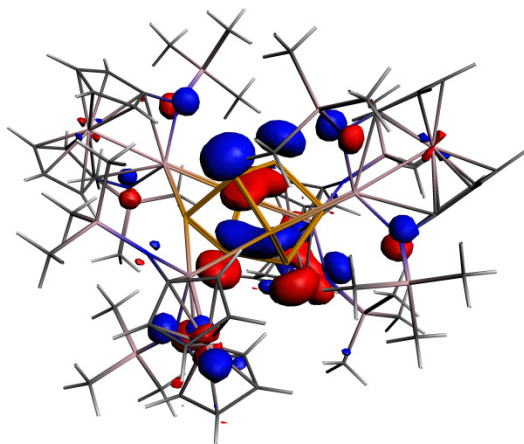

### HOMO-22

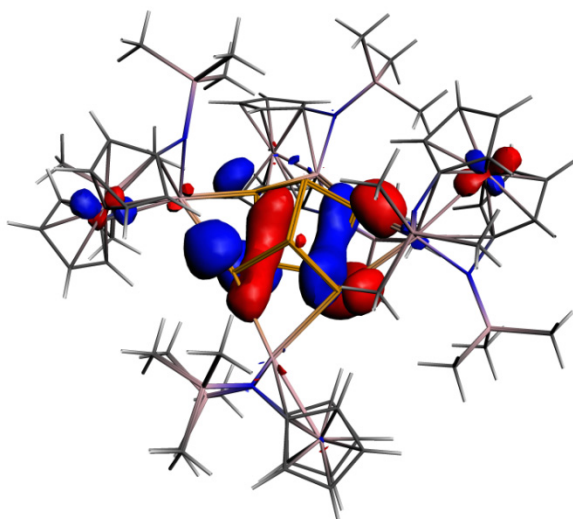

### HOMO-23

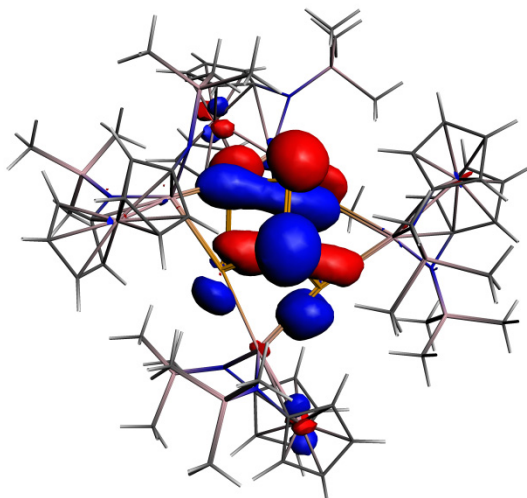

### HOMO-24

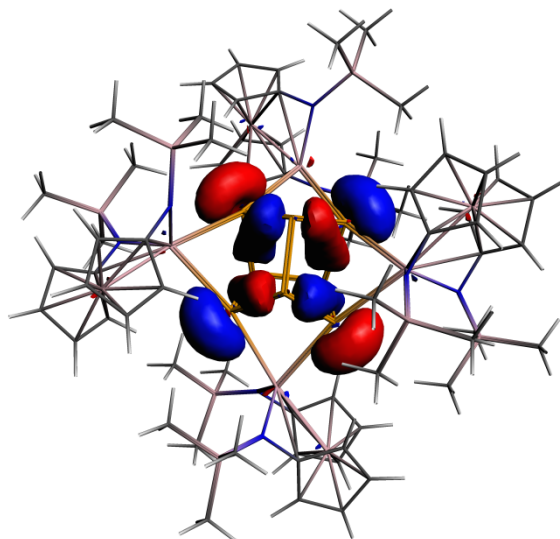

## LUMO

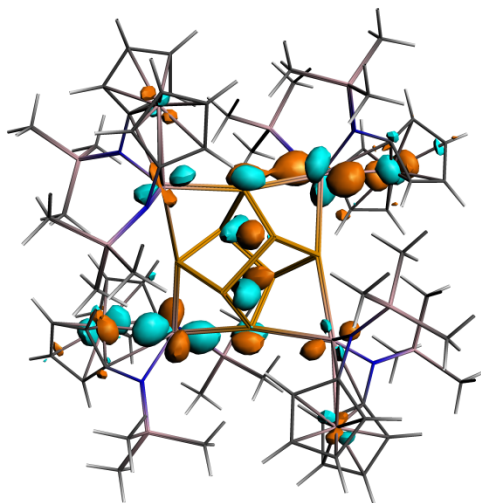

## Selected molecular orbitals for Sc<sub>3</sub>P<sub>7</sub>

### HOMO

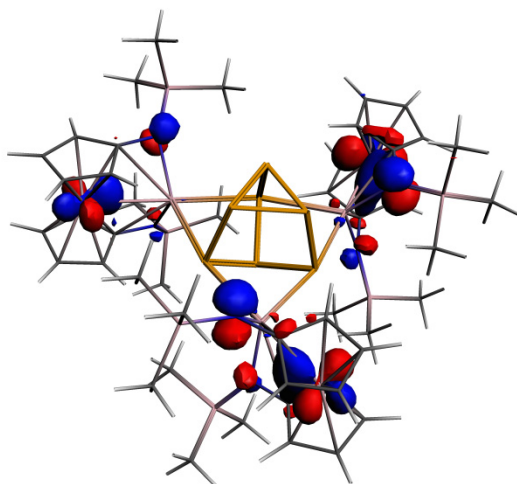

### HOMO-15

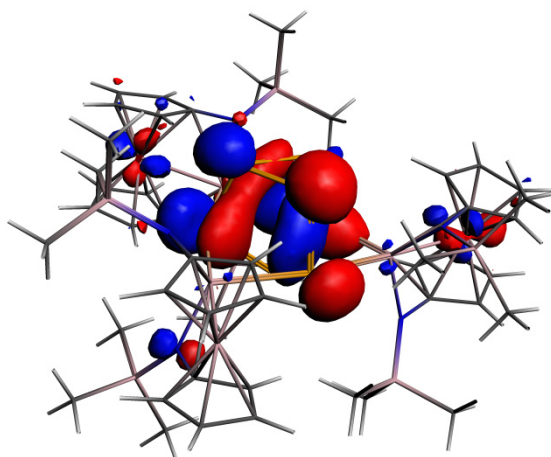

### HOMO-16

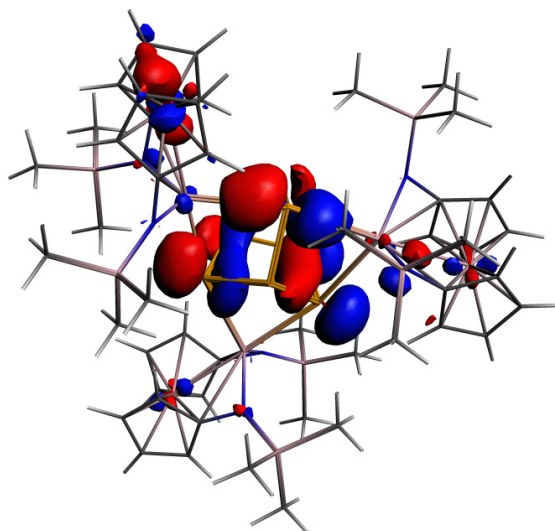

### HOMO-17

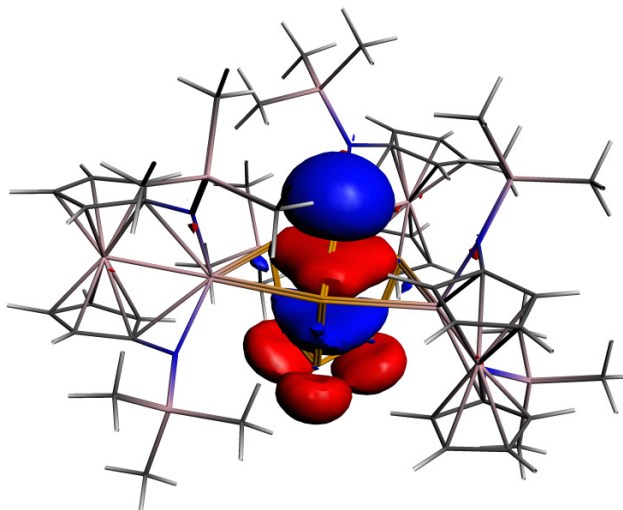

### HOMO-18

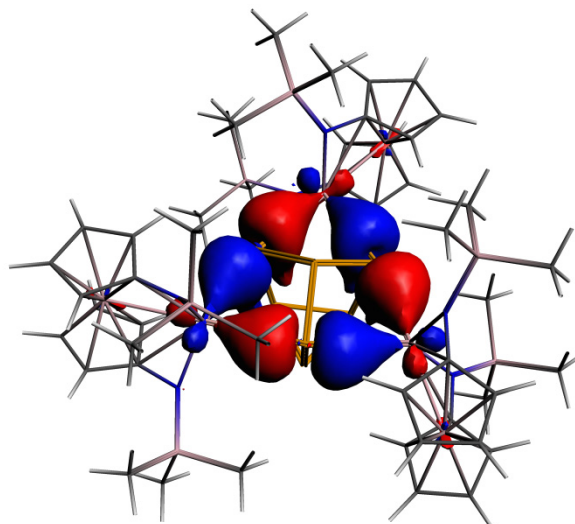

## HOMO-22

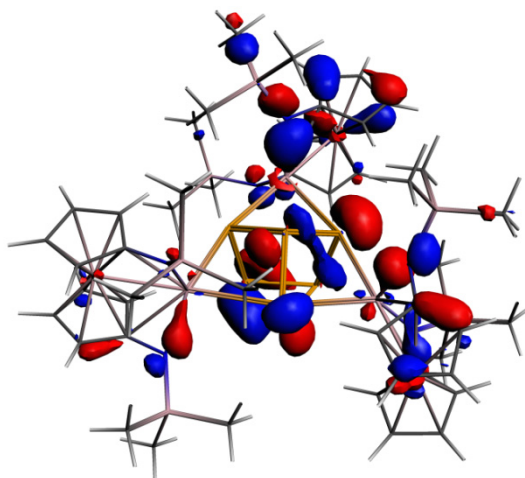

## HOMO-25

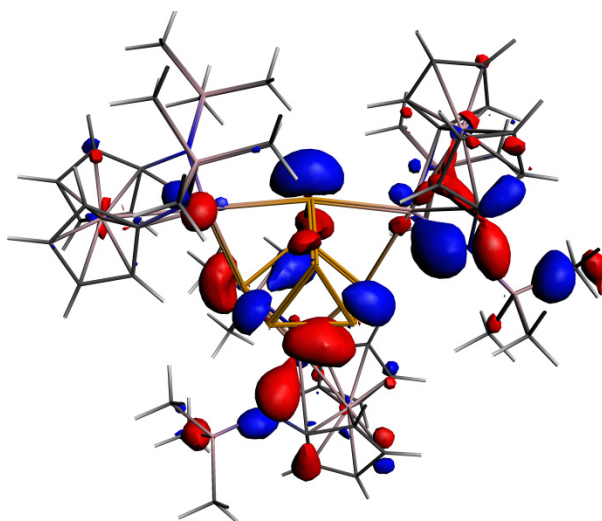

## LUMO

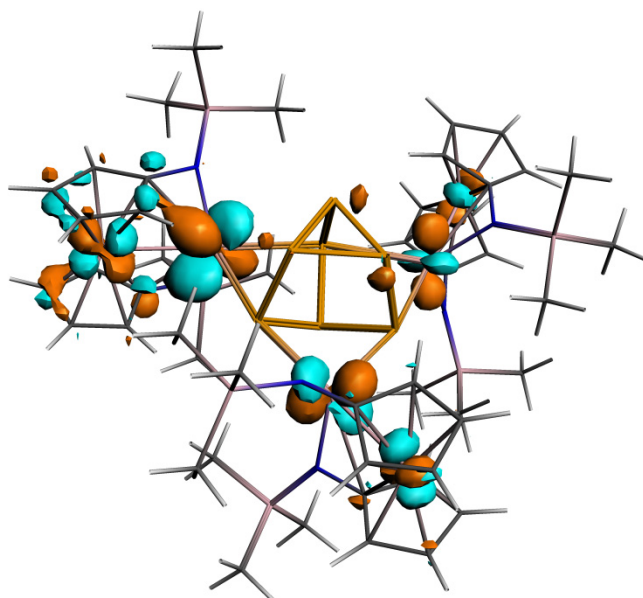

## Selected molecular orbitals for $\text{Y}_3\text{P}_7$

### HOMO

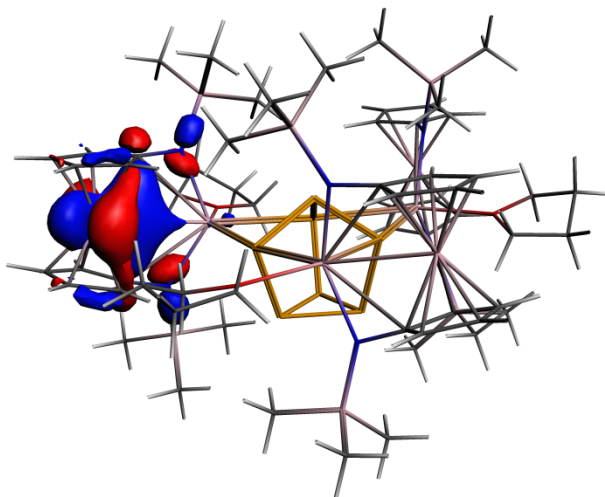

### HOMO-1

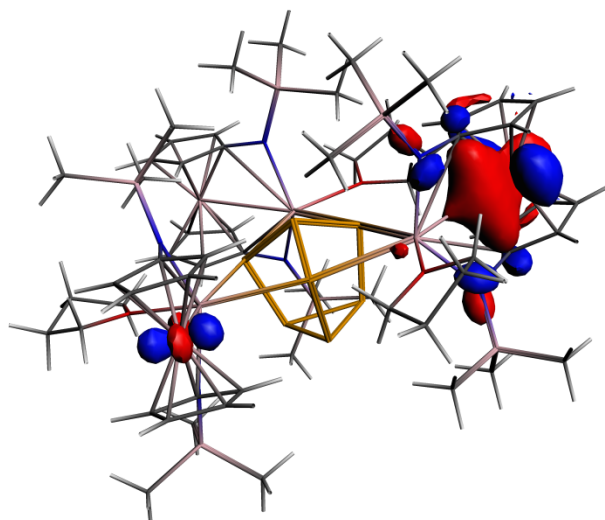

### HOMO-2

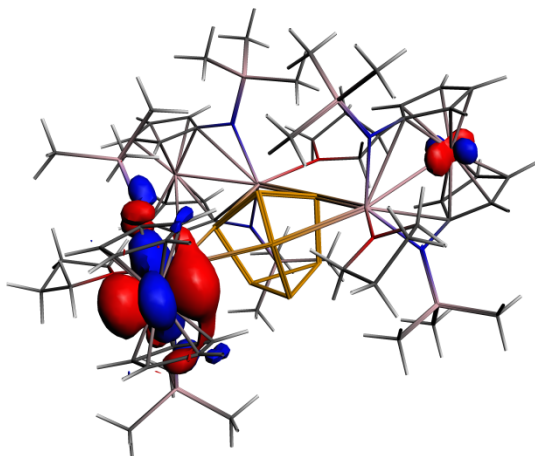



### HOMO-15

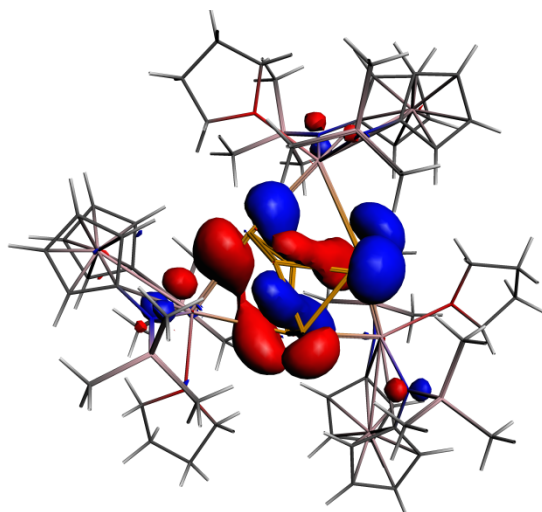

### HOMO-16

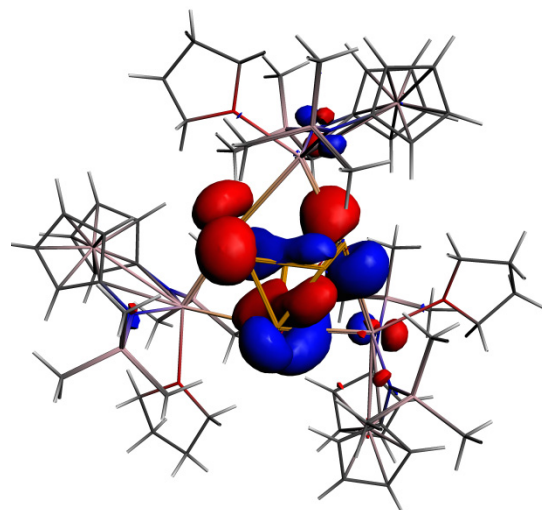

### HOMO-23

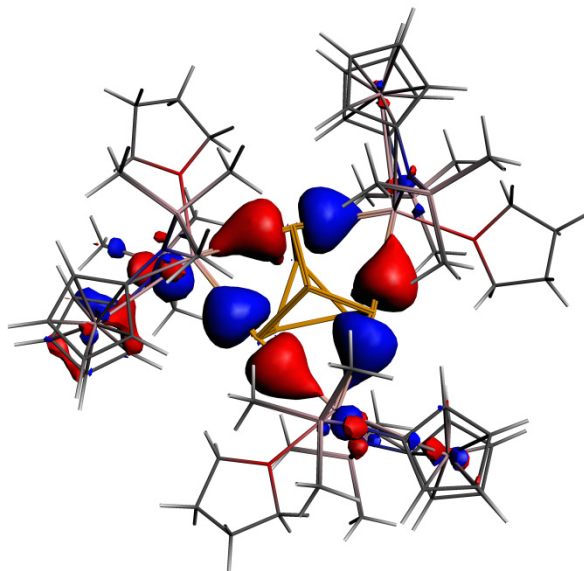

### HOMO-24

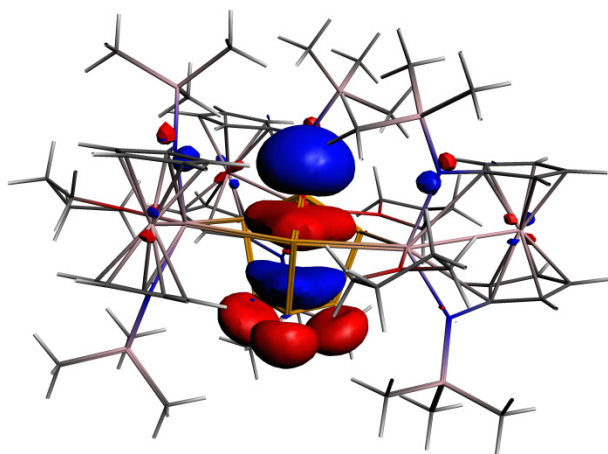

### HOMO-28

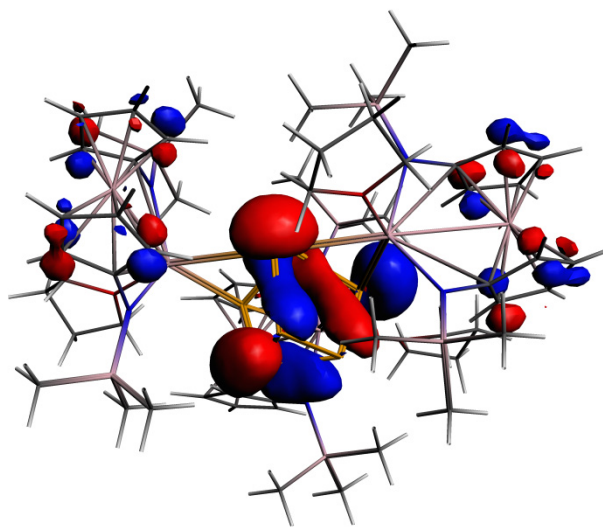

### HOMO-29

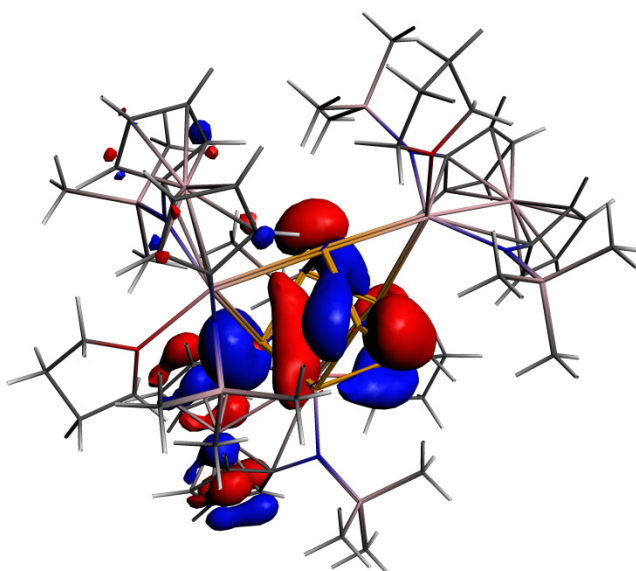



### HOMO-30

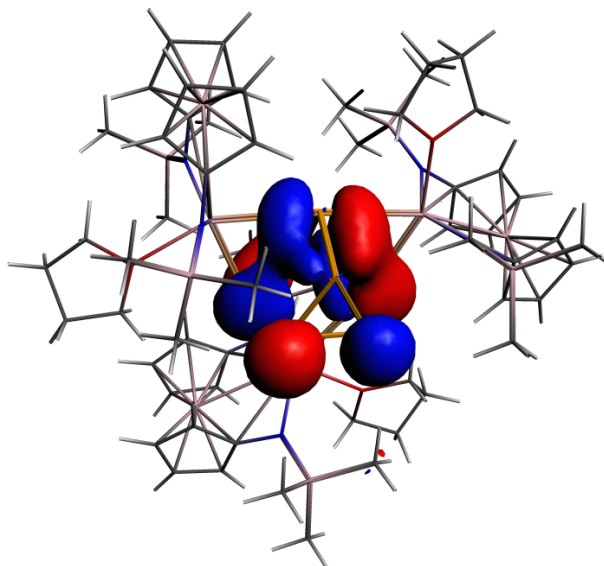

### HOMO-31

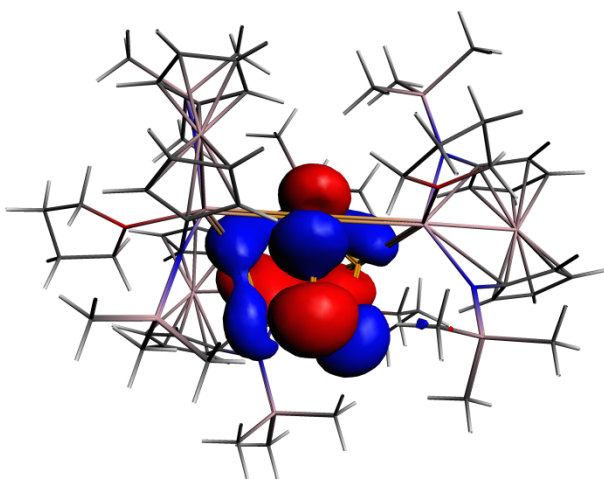

### LUMO

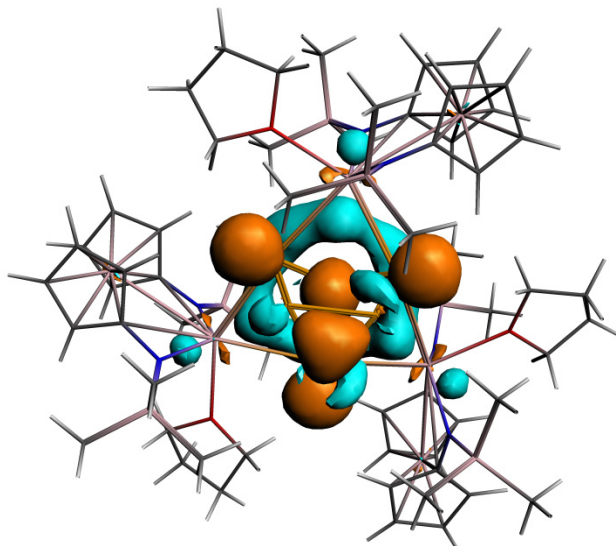

## Optimized coordinates for Sc<sub>4</sub>P<sub>8</sub>

| Atom  | X         | Y         | Z (Angstrom) |
|-------|-----------|-----------|--------------|
| 1.Sc  | 12.472902 | 6.504389  | 17.175533    |
| 2.Sc  | 8.185080  | 7.720193  | 20.617740    |
| 3.Sc  | 6.943944  | 2.351905  | 19.371015    |
| 4.Sc  | 12.480336 | 1.819336  | 20.336931    |
| 5.P   | 10.297130 | 6.832616  | 18.974639    |
| 6.P   | 11.320125 | 5.504621  | 20.448505    |
| 7.P   | 9.518847  | 4.143454  | 21.162068    |
| 8.P   | 9.759661  | 2.376135  | 19.820600    |
| 9.P   | 10.338328 | 3.429938  | 17.938318    |
| 10.P  | 8.933899  | 5.336180  | 18.029705    |
| 11.P  | 7.842000  | 4.970206  | 19.939736    |
| 12.P  | 12.213109 | 4.236566  | 18.841622    |
| 13.Fe | 14.511593 | 5.843545  | 15.350629    |
| 14.Fe | 8.892469  | 10.366678 | 21.325117    |
| 15.Fe | 4.212100  | 2.671026  | 18.704129    |
| 16.Fe | 12.444578 | -0.443943 | 22.033909    |
| 17.Si | 14.171879 | 9.495721  | 18.359123    |
| 18.Si | 10.404185 | 7.798715  | 14.477869    |
| 19.Si | 7.313452  | 6.968824  | 24.064572    |
| 20.Si | 5.017281  | 8.706183  | 19.138508    |
| 21.Si | 6.259781  | 0.022225  | 22.062475    |
| 22.Si | 7.495282  | 0.207538  | 16.472923    |
| 23.Si | 14.885282 | 3.492901  | 22.503381    |
| 24.Si | 14.563923 | 0.195231  | 17.845554    |
| 25.N  | 13.929755 | 7.898469  | 17.681180    |
| 26.N  | 11.461190 | 6.690410  | 15.339097    |
| 27.N  | 8.248704  | 7.596454  | 22.715978    |
| 28.N  | 6.675387  | 8.806993  | 19.695067    |
| 29.N  | 6.019164  | 1.338173  | 20.931776    |
| 30.N  | 6.885271  | 1.542622  | 17.436498    |
| 31.N  | 13.481834 | 2.546298  | 22.034066    |
| 32.N  | 13.396472 | 0.391200  | 19.137119    |
| 33.C  | 14.923780 | 7.201052  | 16.977347    |
| 34.C  | 15.378650 | 5.853279  | 17.290351    |
| 35.H  | 15.078225 | 5.293090  | 18.172630    |
| 36.C  | 16.330270 | 5.438589  | 16.307932    |
| 37.H  | 16.854919 | 4.487596  | 16.289218    |
| 38.C  | 16.479495 | 6.508870  | 15.365116    |
| 39.H  | 17.131176 | 6.504692  | 14.495099    |
| 40.C  | 15.595726 | 7.571274  | 15.746421    |
| 41.H  | 15.455635 | 8.510030  | 15.219221    |
| 42.C  | 12.446860 | 5.949701  | 14.684703    |
| 43.C  | 12.818895 | 4.587333  | 15.046146    |
| 44.H  | 12.260989 | 3.957905  | 15.739434    |
| 45.C  | 13.925484 | 4.170980  | 14.240107    |
| 46.H  | 14.398389 | 3.193278  | 14.261257    |
| 47.C  | 14.265866 | 5.259959  | 13.373058    |
| 48.H  | 15.064024 | 5.259998  | 12.635111    |
| 49.C  | 13.400315 | 6.361793  | 13.671313    |
| 50.H  | 13.433453 | 7.342551  | 13.208597    |
| 51.C  | 12.473454 | 10.305278 | 18.533158    |
| 52.H  | 12.015627 | 10.470317 | 17.545874    |
| 53.H  | 12.568362 | 11.287031 | 19.023960    |
| 54.H  | 11.778523 | 9.697299  | 19.131707    |
| 55.C  | 15.243786 | 10.602836 | 17.247962    |
| 56.H  | 14.777525 | 10.763122 | 16.264010    |
| 57.H  | 16.245858 | 10.177648 | 17.086989    |
| 58.H  | 15.375954 | 11.590887 | 17.718251    |
| 59.C  | 14.994187 | 9.378508  | 20.063145    |
| 60.H  | 14.392978 | 8.763010  | 20.749485    |
| 61.H  | 12.979461 | -1.347788 | 24.665215    |
| 62.C  | 13.698538 | 0.406433  | 23.455782    |

|       |           |           |           |
|-------|-----------|-----------|-----------|
| 63.H  | 14.776049 | 0.278123  | 23.457059 |
| 64.H  | 15.120628 | 10.374544 | 20.518133 |
| 65.C  | 12.971099 | -0.667236 | 19.954762 |
| 66.C  | 11.582323 | -1.038644 | 20.185967 |
| 67.H  | 10.735832 | -0.604734 | 19.659893 |
| 68.H  | 15.991051 | 8.916311  | 19.989111 |
| 69.C  | 11.533303 | -2.103254 | 21.137804 |
| 70.H  | 10.635373 | -2.599044 | 21.495178 |
| 71.C  | 12.880969 | -2.408896 | 21.521403 |
| 72.C  | 11.348980 | 9.105169  | 13.460434 |
| 73.H  | 12.154702 | 9.571598  | 14.047289 |
| 74.H  | 10.658582 | 9.905582  | 13.147298 |
| 75.H  | 11.789089 | 8.683223  | 12.544795 |
| 76.C  | 9.380119  | 8.714072  | 15.769937 |
| 77.H  | 8.807126  | 8.013239  | 16.395254 |
| 78.H  | 8.665337  | 9.396280  | 15.284554 |
| 79.H  | 10.021328 | 9.319122  | 16.428318 |
| 80.C  | 9.272332  | 6.837280  | 13.304875 |
| 81.H  | 9.857415  | 6.277828  | 12.557605 |
| 82.H  | 16.168437 | 5.270056  | 21.313514 |
| 83.C  | 16.422336 | 2.423663  | 22.861576 |
| 84.H  | 14.221239 | 3.862425  | 24.894096 |
| 85.H  | 8.593726  | 7.514545  | 12.761098 |
| 86.H  | 16.330561 | 1.860610  | 23.802023 |
| 87.C  | 12.990406 | 1.502804  | 22.821650 |
| 88.C  | 11.573154 | 1.228196  | 23.023761 |
| 89.H  | 8.659041  | 6.112297  | 13.861278 |
| 90.C  | 15.280305 | 1.902298  | 17.467715 |
| 91.H  | 15.867435 | 2.278022  | 18.319805 |
| 92.H  | 14.501640 | 2.646271  | 17.241882 |
| 93.C  | 8.986821  | 8.779174  | 22.803456 |
| 94.C  | 10.279847 | 8.984730  | 22.162249 |
| 95.H  | 10.870587 | 8.195552  | 21.697481 |
| 96.C  | 10.701682 | 10.336349 | 22.372697 |
| 97.H  | 11.638999 | 10.772417 | 22.039454 |
| 98.C  | 9.684937  | 10.994902 | 23.138755 |
| 99.H  | 9.707375  | 12.030440 | 23.468685 |
| 100.C | 8.616907  | 10.065998 | 23.363556 |
| 101.H | 7.686788  | 10.275058 | 23.881786 |
| 102.C | 7.366218  | 10.020287 | 19.840696 |
| 103.C | 8.643269  | 10.336224 | 19.216549 |
| 104.H | 9.139730  | 9.705009  | 18.484008 |
| 105.C | 9.076535  | 11.623449 | 19.660074 |
| 106.H | 9.986320  | 12.131300 | 19.353198 |
| 107.C | 8.088494  | 12.127222 | 20.569909 |
| 108.H | 8.124979  | 13.084744 | 21.083306 |
| 109.C | 7.061943  | 11.137411 | 20.713398 |
| 110.H | 6.186608  | 11.207648 | 21.351983 |
| 111.C | 6.349100  | 5.474420  | 23.433699 |
| 112.H | 5.633883  | 5.760438  | 22.647861 |
| 113.H | 5.774773  | 5.013979  | 24.252530 |
| 114.H | 7.024155  | 4.708391  | 23.023481 |
| 115.C | 6.052366  | 8.221779  | 24.753314 |
| 116.H | 5.460295  | 8.684326  | 23.949084 |
| 117.H | 6.534689  | 9.023909  | 25.331217 |
| 118.H | 5.350261  | 7.711501  | 25.432932 |
| 119.C | 8.467778  | 6.451011  | 25.471502 |
| 120.H | 9.063714  | 7.304905  | 25.830804 |
| 121.H | 8.692217  | 1.596560  | 14.770877 |
| 122.H | 14.451576 | -0.609932 | 15.464074 |
| 123.H | 13.182735 | -3.172741 | 22.233593 |
| 124.H | 9.167899  | 5.671278  | 25.135196 |
| 125.C | 13.760024 | -1.510000 | 20.832981 |
| 126.H | 14.840202 | -1.466511 | 20.934751 |

|       |           |           |           |
|-------|-----------|-----------|-----------|
| 127.H | 13.307592 | -1.504034 | 16.491620 |
| 128.H | 7.898695  | 6.054469  | 26.327977 |
| 129.H | 8.332446  | -0.022948 | 14.117059 |
| 130.C | 15.305814 | 4.634164  | 21.060868 |
| 131.H | 14.460461 | 5.294974  | 20.817153 |
| 132.C | 4.295152  | 7.085817  | 19.789488 |
| 133.H | 4.245860  | 7.090438  | 20.889059 |
| 134.H | 4.887026  | 6.211324  | 19.479471 |
| 135.H | 3.270015  | 6.947305  | 19.410594 |
| 136.C | 3.948803  | 10.136673 | 19.786433 |
| 137.H | 3.890561  | 10.133601 | 20.885496 |
| 138.H | 2.921196  | 10.044867 | 19.398593 |
| 139.H | 4.336009  | 11.115857 | 19.466815 |
| 140.C | 4.948805  | 8.709176  | 17.243683 |
| 141.H | 3.913922  | 8.608504  | 16.878031 |
| 142.H | 15.954918 | 1.848041  | 16.598463 |
| 143.C | 16.002713 | -0.948876 | 18.326338 |
| 144.H | 16.549663 | -0.562412 | 19.199797 |
| 145.H | 5.358652  | 9.646061  | 16.835218 |
| 146.H | 16.718849 | -1.022533 | 17.491641 |
| 147.H | 15.661823 | -1.968913 | 18.558572 |
| 148.C | 13.732066 | -0.507277 | 16.292803 |
| 149.H | 5.540589  | 7.879460  | 16.828007 |
| 150.H | 12.910905 | 0.142920  | 15.954812 |
| 151.H | 15.568339 | 4.061467  | 20.158487 |
| 152.H | 7.048732  | 1.206466  | 14.212759 |
| 153.C | 4.766752  | 1.902182  | 20.645084 |
| 154.C | 3.583974  | 1.263870  | 20.099996 |
| 155.H | 3.489195  | 0.202487  | 19.891546 |
| 156.C | 2.570451  | 2.258638  | 19.906327 |
| 157.H | 1.567162  | 2.079369  | 19.527762 |
| 158.C | 3.116864  | 3.534924  | 20.265685 |
| 159.H | 2.603101  | 4.490620  | 20.221172 |
| 160.C | 4.457831  | 3.323620  | 20.712082 |
| 161.H | 5.133519  | 4.079718  | 21.104102 |
| 162.C | 5.656655  | 2.154593  | 17.170461 |
| 163.C | 4.352947  | 1.554401  | 16.957142 |
| 164.H | 4.159444  | 0.487668  | 16.908408 |
| 165.C | 3.382126  | 2.596987  | 16.802275 |
| 166.H | 2.322603  | 2.454859  | 16.604839 |
| 167.C | 4.039307  | 3.857306  | 16.989734 |
| 168.H | 3.574853  | 4.837785  | 16.937740 |
| 169.C | 5.427617  | 3.593615  | 17.217567 |
| 170.H | 6.216010  | 4.341020  | 17.306490 |
| 171.C | 7.902610  | -0.805706 | 21.628766 |
| 172.H | 7.847561  | -1.296648 | 20.645005 |
| 173.H | 8.145836  | -1.580675 | 22.373072 |
| 174.H | 8.739843  | -0.092046 | 21.602893 |
| 175.C | 4.893485  | -1.293526 | 21.956485 |
| 176.H | 4.842890  | -1.742371 | 20.952658 |
| 177.H | 3.902563  | -0.881210 | 22.198885 |
| 178.H | 5.097707  | -2.105169 | 22.673761 |
| 179.C | 6.331045  | 0.673484  | 23.841219 |
| 180.H | 5.385800  | 1.165164  | 24.119649 |
| 181.H | 17.312849 | 3.066702  | 22.955214 |
| 182.H | 16.613666 | 1.707451  | 22.047843 |
| 183.C | 14.493422 | 4.513747  | 24.048449 |
| 184.H | 7.137667  | 1.413216  | 23.957860 |
| 185.H | 13.648406 | 5.193807  | 23.862461 |
| 186.H | 10.766308 | 1.895701  | 22.721576 |
| 187.C | 11.430253 | 0.034682  | 23.800054 |
| 188.H | 6.508503  | -0.142682 | 24.560328 |
| 189.H | 10.493442 | -0.400480 | 24.135676 |
| 190.H | 15.360497 | 5.120112  | 24.356831 |

|       |           |           |           |
|-------|-----------|-----------|-----------|
| 191.C | 12.745663 | -0.456253 | 24.088891 |
| 192.C | 9.040447  | -0.451186 | 17.332983 |
| 193.H | 8.807594  | -0.831093 | 18.339203 |
| 194.H | 9.808109  | 0.331402  | 17.427384 |
| 195.H | 9.477300  | -1.281752 | 16.757151 |
| 196.C | 6.256633  | -1.232550 | 16.328624 |
| 197.H | 5.877499  | -1.539983 | 17.315417 |
| 198.H | 6.749988  | -2.107480 | 15.874255 |
| 199.H | 5.396113  | -0.979437 | 15.691736 |
| 200.C | 7.932631  | 0.801060  | 14.730141 |

**Optimized coordinates for Sc<sub>3</sub>P<sub>7</sub>**

|       |           |           |              |
|-------|-----------|-----------|--------------|
| Atom  | X         | Y         | Z (Angstrom) |
| 1.Sc  | 8.765765  | 0.762348  | 7.361533     |
| 2.Sc  | 10.154918 | -3.978483 | 4.733041     |
| 3.Sc  | 14.143565 | -0.791913 | 6.992072     |
| 4.Fe  | 5.977845  | 1.246575  | 7.358250     |
| 5.Fe  | 11.119839 | -6.369964 | 3.548489     |
| 6.Fe  | 15.884104 | 1.018982  | 8.314267     |
| 7.P   | 11.101453 | -0.844588 | 5.503949     |
| 8.P   | 11.548119 | 0.249803  | 7.401263     |
| 9.P   | 9.102261  | -1.706239 | 6.022210     |
| 10.P  | 12.392008 | -2.651599 | 5.794025     |
| 11.P  | 11.766702 | -3.276603 | 7.839546     |
| 12.P  | 11.167342 | -1.357055 | 8.900343     |
| 13.P  | 9.573129  | -2.686708 | 7.972829     |
| 14.Si | 9.461548  | 3.774168  | 5.401611     |
| 15.Si | 8.969149  | 2.050092  | 10.763083    |
| 16.Si | 9.230669  | -2.541527 | 1.506972     |
| 17.Si | 7.111293  | -5.697413 | 5.629825     |
| 18.Si | 15.554997 | -0.055965 | 3.713722     |
| 19.Si | 16.153564 | -3.607900 | 8.181333     |
| 20.N  | 8.631771  | 2.380175  | 6.078510     |
| 21.N  | 8.382469  | 1.090689  | 9.411763     |
| 22.N  | 10.037083 | -3.525518 | 2.720725     |
| 23.N  | 8.848623  | -5.428268 | 5.568658     |
| 24.N  | 15.088443 | 0.120775  | 5.398816     |
| 25.N  | 15.282741 | -2.084354 | 8.213815     |
| 26.C  | 7.239963  | 2.240817  | 5.937279     |
| 27.C  | 6.572167  | 1.098395  | 5.328776     |
| 28.H  | 7.085420  | 0.279786  | 4.829388     |
| 29.C  | 5.159025  | 1.272689  | 5.429863     |
| 30.H  | 4.401645  | 0.591322  | 5.051049     |
| 31.C  | 4.919089  | 2.514923  | 6.104867     |
| 32.H  | 3.944105  | 2.933310  | 6.341404     |
| 33.C  | 6.184541  | 3.093485  | 6.447778     |
| 34.H  | 6.340689  | 4.019462  | 6.993015     |
| 35.C  | 7.022863  | 0.849892  | 9.220016     |
| 36.C  | 6.486828  | -0.371299 | 8.629178     |
| 37.H  | 7.066344  | -1.274294 | 8.438139     |
| 38.C  | 5.067320  | -0.247715 | 8.488730     |
| 39.H  | 4.394330  | -1.013302 | 8.113651     |
| 40.C  | 4.695822  | 1.047955  | 8.974027     |
| 41.H  | 3.686807  | 1.451005  | 9.004290     |
| 42.C  | 5.886722  | 1.738789  | 9.373074     |
| 43.H  | 5.938153  | 2.755975  | 9.746675     |
| 44.C  | 11.283664 | 3.654168  | 5.881444     |
| 45.H  | 11.419512 | 3.649096  | 6.973030     |
| 46.H  | 11.839321 | 4.513220  | 5.474206     |
| 47.C  | 14.901618 | 1.399502  | 2.690682     |
| 48.H  | 11.737522 | 2.738010  | 5.475030     |
| 49.C  | 8.760960  | 5.411768  | 6.068195     |
| 50.H  | 8.784294  | 5.446199  | 7.168226     |

|       |           |           |           |
|-------|-----------|-----------|-----------|
| 51.H  | 7.722436  | 5.572764  | 5.742208  |
| 52.H  | 9.356652  | 6.260199  | 5.693919  |
| 53.C  | 9.302390  | 3.779628  | 3.513596  |
| 54.H  | 9.744776  | 2.870051  | 3.079164  |
| 55.H  | 17.910557 | 2.954958  | 7.918094  |
| 56.C  | 16.979294 | 1.389537  | 6.597712  |
| 57.H  | 13.804290 | 1.459186  | 2.750777  |
| 58.H  | 9.817461  | 4.650446  | 3.076648  |
| 59.H  | 17.829455 | 0.791972  | 6.282933  |
| 60.C  | 15.676245 | -1.020682 | 9.025042  |
| 61.C  | 14.747031 | -0.117312 | 9.694474  |
| 62.H  | 8.246758  | 3.823338  | 3.201494  |
| 63.C  | 18.007211 | -3.410031 | 7.782656  |
| 64.H  | 18.166654 | -2.777616 | 6.896163  |
| 65.H  | 18.450961 | -4.396979 | 7.572499  |
| 66.C  | 8.401966  | 3.868987  | 10.696039 |
| 67.H  | 8.599374  | 4.312906  | 9.708312  |
| 68.H  | 8.949609  | 4.462850  | 11.446103 |
| 69.H  | 7.329712  | 3.985730  | 10.913400 |
| 70.C  | 10.857164 | 2.039378  | 10.712231 |
| 71.H  | 11.247951 | 1.015256  | 10.806323 |
| 72.H  | 11.257849 | 2.634415  | 11.548283 |
| 73.H  | 11.249473 | 2.465371  | 9.776274  |
| 74.C  | 8.372790  | 1.295027  | 12.394290 |
| 75.H  | 7.273105  | 1.260711  | 12.443431 |
| 76.H  | 15.081509 | -1.813467 | 2.012962  |
| 77.H  | 13.704472 | -1.642576 | 3.124169  |
| 78.H  | 8.728687  | 1.883479  | 13.255338 |
| 79.H  | 15.311547 | 2.356819  | 3.049441  |
| 80.H  | 13.672218 | -0.281283 | 9.772737  |
| 81.C  | 15.483651 | 0.917736  | 10.355119 |
| 82.H  | 8.745448  | 0.265468  | 12.506733 |
| 83.H  | 15.062001 | 1.712352  | 10.963958 |
| 84.H  | 15.178397 | 1.292694  | 1.629414  |
| 85.C  | 16.874986 | 0.686978  | 10.102351 |
| 86.C  | 10.833325 | -4.622778 | 2.345222  |
| 87.C  | 12.239165 | -4.793038 | 2.682893  |
| 88.H  | 12.845965 | -4.042942 | 3.184062  |
| 89.C  | 12.688632 | -6.056423 | 2.194243  |
| 90.H  | 13.695957 | -6.454359 | 2.283046  |
| 91.C  | 11.578741 | -6.697536 | 1.552105  |
| 92.H  | 11.595266 | -7.676597 | 1.080077  |
| 93.C  | 10.435135 | -5.841390 | 1.668328  |
| 94.H  | 9.433470  | -6.053949 | 1.307203  |
| 95.C  | 9.731909  | -6.446166 | 5.227279  |
| 96.C  | 11.123209 | -6.493874 | 5.663510  |
| 97.H  | 11.556474 | -5.838887 | 6.420100  |
| 98.C  | 11.767099 | -7.628629 | 5.072405  |
| 99.H  | 12.791469 | -7.945135 | 5.247481  |
| 100.C | 10.801618 | -8.292751 | 4.247236  |
| 101.H | 10.975593 | -9.192280 | 3.662301  |
| 102.C | 9.578958  | -7.546303 | 4.294886  |
| 103.H | 8.670180  | -7.777013 | 3.747954  |
| 104.C | 8.147889  | -1.285962 | 2.411089  |
| 105.H | 7.392076  | -1.777810 | 3.041591  |
| 106.H | 7.619708  | -0.647980 | 1.685478  |
| 107.H | 8.756620  | -0.631197 | 3.053091  |
| 108.C | 8.133832  | -3.584548 | 0.356582  |
| 109.H | 7.401482  | -4.181870 | 0.920951  |
| 110.H | 8.731253  | -4.270639 | -0.262494 |
| 111.H | 7.573585  | -2.928139 | -0.329118 |
| 112.C | 10.506963 | -1.630165 | 0.445119  |
| 113.C | 15.997984 | -4.475932 | 9.857272  |
| 114.H | 11.138207 | -0.973855 | 1.063047  |

|       |           |           |           |
|-------|-----------|-----------|-----------|
| 115.H | 17.697427 | 1.296724  | 10.467310 |
| 116.H | 16.416734 | -3.856150 | 10.665807 |
| 117.C | 16.995211 | -0.460522 | 9.251925  |
| 118.H | 10.012118 | -1.006472 | -0.317017 |
| 119.H | 17.919312 | -0.862283 | 8.849906  |
| 120.C | 17.443532 | -0.146241 | 3.506726  |
| 121.H | 14.941917 | -4.671776 | 10.097447 |
| 122.H | 11.167867 | -2.337987 | -0.079582 |
| 123.H | 17.874548 | -0.973304 | 4.091284  |
| 124.H | 17.935399 | 0.787500  | 3.817724  |
| 125.H | 17.700050 | -0.315359 | 2.448236  |
| 126.C | 15.606345 | 1.158256  | 6.194661  |
| 127.C | 6.322408  | -5.742211 | 3.896828  |
| 128.C | 6.724769  | -7.328076 | 6.517583  |
| 129.H | 7.154030  | -8.197428 | 5.998360  |
| 130.H | 5.635956  | -7.480988 | 6.578341  |
| 131.H | 7.123257  | -7.321420 | 7.542481  |
| 132.C | 6.328935  | -4.266522 | 6.582481  |
| 133.H | 6.511214  | -3.299315 | 6.089297  |
| 134.H | 6.733453  | -4.205214 | 7.604143  |
| 135.H | 5.238633  | -4.408879 | 6.653198  |
| 136.H | 5.226644  | -5.839977 | 3.962810  |
| 137.C | 15.395284 | -4.692432 | 6.832754  |
| 138.H | 14.331056 | -4.891944 | 7.025970  |
| 139.H | 18.570477 | -2.975805 | 8.621952  |
| 140.H | 6.692523  | -6.582950 | 3.290059  |
| 141.H | 15.919361 | -5.660944 | 6.796273  |
| 142.H | 15.475997 | -4.228521 | 5.838098  |
| 143.H | 6.545256  | -4.815443 | 3.345914  |
| 144.H | 16.534653 | -5.438403 | 9.859110  |
| 145.C | 14.803292 | -1.664152 | 3.068157  |
| 146.H | 15.157913 | -2.537018 | 3.636890  |
| 147.C | 14.810539 | 2.161346  | 6.888829  |
| 148.H | 13.734047 | 2.272407  | 6.785374  |
| 149.C | 15.676317 | 2.997061  | 7.656612  |
| 150.H | 15.373357 | 3.841663  | 8.269352  |
| 151.C | 17.018768 | 2.531128  | 7.463799  |

### Optimized coordinates for Y<sub>3</sub>P<sub>7</sub>

| Atom  | X         | Y         | Z (Angstrom) |
|-------|-----------|-----------|--------------|
| 1.Y   | -1.604576 | 16.479178 | 13.266666    |
| 2.Y   | 2.942218  | 13.001026 | 11.344716    |
| 3.Y   | 3.360407  | 19.025014 | 11.016889    |
| 4.Fe  | -3.456117 | 13.977418 | 14.658819    |
| 5.Fe  | 6.223205  | 12.358615 | 10.592591    |
| 6.Fe  | 2.573586  | 22.221264 | 11.933443    |
| 7.Si  | -4.288806 | 16.485388 | 10.646638    |
| 8.Si  | -0.433277 | 17.094052 | 16.729574    |
| 9.Si  | 2.316691  | 11.746955 | 7.873948     |
| 10.Si | 4.012146  | 12.506192 | 14.861066    |
| 11.Si | 2.535047  | 20.219342 | 7.562051     |
| 12.Si | 5.436667  | 19.003862 | 14.081231    |
| 13.P  | 1.860380  | 15.963106 | 9.287288     |
| 14.P  | 0.163804  | 17.312867 | 9.994869     |
| 15.P  | -0.045600 | 15.049634 | 10.144119    |
| 16.P  | 0.472894  | 14.555547 | 12.241336    |
| 17.P  | 0.744009  | 17.953831 | 12.036328    |
| 18.P  | 3.304989  | 15.971445 | 10.968761    |
| 19.P  | 1.924216  | 16.183640 | 12.703949    |
| 20.N  | -3.425131 | 15.930592 | 12.064362    |
| 21.N  | -1.334050 | 16.269176 | 15.483196    |
| 22.N  | 3.275503  | 12.249715 | 9.249460     |
| 23.N  | 4.231331  | 12.587323 | 13.129913    |
| 24.N  | 2.704781  | 20.325958 | 9.301487     |



|      |           |           |           |
|------|-----------|-----------|-----------|
| 25.N | 4.333890  | 19.696818 | 12.919480 |
| 26.O | -2.443990 | 18.797633 | 13.575352 |
| 27.O | 1.477908  | 11.074323 | 11.879103 |
| 28.O | 5.555896  | 18.664300 | 9.933436  |
| 29.C | -3.647815 | 18.951780 | 14.400187 |
| 30.H | -3.520510 | 18.304200 | 15.276744 |
| 31.H | -4.511539 | 18.608653 | 13.810704 |
| 32.C | -3.720602 | 20.439421 | 14.719421 |
| 33.H | -3.086723 | 20.676968 | 15.586461 |
| 34.H | -4.745312 | 20.765999 | 14.939715 |
| 35.C | -3.146125 | 21.070059 | 13.439328 |
| 36.H | -3.909307 | 21.090049 | 12.647426 |
| 37.H | -2.779134 | 22.093929 | 13.588346 |
| 38.C | -2.018784 | 20.109857 | 13.070543 |
| 39.H | -1.851023 | 20.016361 | 11.991767 |
| 40.H | -1.068298 | 20.366589 | 13.558159 |
| 41.C | 0.063172  | 10.949289 | 12.264363 |
| 42.H | -0.549377 | 11.308155 | 11.428582 |
| 43.H | -0.097773 | 11.603334 | 13.130448 |
| 44.C | -0.153050 | 9.468521  | 12.583851 |
| 45.H | -0.869684 | 9.331597  | 13.404435 |
| 46.H | -0.537683 | 8.935673  | 11.702445 |
| 47.C | 1.261714  | 8.971221  | 12.935521 |
| 48.H | 1.380478  | 7.886851  | 12.809845 |
| 49.H | 1.520356  | 9.231467  | 13.972879 |
| 50.C | 2.126121  | 9.763369  | 11.965606 |
| 51.H | 3.153574  | 9.936570  | 12.311087 |
| 52.H | 2.143586  | 9.314036  | 10.959887 |
| 53.C | 6.262055  | 17.492857 | 9.404733  |
| 54.H | 5.882274  | 17.290398 | 8.391551  |
| 55.H | 6.020238  | 16.645160 | 10.056330 |
| 56.C | 7.730381  | 17.896689 | 9.390419  |
| 57.H | 8.178443  | 17.750890 | 10.384840 |
| 58.H | 8.310794  | 17.317484 | 8.660513  |
| 59.C | 7.651669  | 19.393825 | 9.045128  |
| 60.H | 8.550975  | 19.952638 | 9.336836  |
| 61.H | 7.498868  | 19.528933 | 7.964247  |
| 62.C | 6.419090  | 19.850930 | 9.823139  |
| 63.H | 6.660868  | 20.173013 | 10.846340 |
| 64.H | 5.838486  | 20.635342 | 9.321358  |
| 65.C | -6.145256 | 16.732925 | 10.994541 |
| 66.H | -6.314077 | 17.474213 | 11.791542 |
| 67.H | -6.631034 | 15.793905 | 11.300630 |
| 68.H | -6.659380 | 17.093985 | 10.089068 |
| 69.C | -4.109207 | 15.266219 | 9.205869  |
| 70.C | -3.574146 | 18.161614 | 10.134029 |
| 71.H | -2.500764 | 18.100347 | 9.896406  |
| 72.H | -3.714924 | 18.913626 | 10.925213 |
| 73.H | -4.085755 | 18.529781 | 9.231268  |
| 74.H | -4.525418 | 14.280008 | 9.468034  |
| 75.C | 4.380116  | 22.253031 | 12.965732 |
| 76.H | 5.361370  | 22.412675 | 12.526741 |
| 77.C | 3.496930  | 23.267846 | 13.457066 |
| 78.H | -4.633810 | 15.624679 | 8.305498  |
| 79.H | 3.682517  | 24.339023 | 13.443627 |
| 80.C | 2.311600  | 22.623115 | 13.950352 |
| 81.H | 1.444652  | 23.122986 | 14.376292 |
| 82.H | -3.047457 | 15.123908 | 8.950187  |
| 83.C | 2.471599  | 21.213222 | 13.771587 |
| 84.H | 1.767259  | 20.436553 | 14.056224 |
| 85.C | 4.624174  | 10.849800 | 15.574033 |
| 86.C | 0.412123  | 18.575646 | 15.912912 |
| 87.H | -0.324501 | 19.272505 | 15.489480 |
| 88.H | 1.080418  | 18.254259 | 15.101456 |



|       |           |           |           |
|-------|-----------|-----------|-----------|
| 89.H  | 1.021313  | 19.131460 | 16.641464 |
| 90.C  | 0.883099  | 15.981729 | 17.517835 |
| 91.H  | 0.424874  | 15.093594 | 17.980315 |
| 92.H  | 1.440027  | 16.519559 | 18.302010 |
| 93.H  | 1.607147  | 15.633358 | 16.766146 |
| 94.C  | -1.569738 | 17.732193 | 18.118181 |
| 95.H  | -2.319664 | 18.443145 | 17.735365 |
| 96.C  | 2.957700  | 22.782374 | 9.967536  |
| 97.H  | 3.938256  | 22.973789 | 9.540359  |
| 98.C  | 2.116178  | 23.742682 | 10.615944 |
| 99.H  | -2.109049 | 16.903733 | 18.602592 |
| 100.H | 2.350555  | 24.791294 | 10.781049 |
| 101.C | 0.916218  | 23.070982 | 11.032054 |
| 102.H | 0.085872  | 23.526529 | 11.566424 |
| 103.H | -0.987294 | 18.249507 | 18.898304 |
| 104.C | 1.017109  | 21.702905 | 10.624873 |
| 105.H | 0.275883  | 20.921376 | 10.766626 |
| 106.C | 3.775565  | 20.956503 | 13.190430 |
| 107.C | 0.508814  | 11.647065 | 8.427746  |
| 108.H | 0.133539  | 12.615126 | 8.795168  |
| 109.H | 0.377028  | 10.898186 | 9.224193  |
| 110.H | -0.131103 | 11.349712 | 7.581770  |
| 111.C | 2.823793  | 10.024636 | 7.233773  |
| 112.H | 2.726081  | 9.254751  | 8.016366  |
| 113.H | 3.865512  | 10.013485 | 6.877991  |
| 114.H | 2.181649  | 9.725264  | 6.389039  |
| 115.C | 2.467220  | 12.974827 | 6.436542  |
| 116.H | 1.834126  | 12.675879 | 5.585237  |
| 117.C | -1.616199 | 13.742352 | 15.642540 |
| 118.H | -0.665958 | 13.458773 | 15.198927 |
| 119.C | -2.603691 | 12.863230 | 16.186931 |
| 120.H | 3.505695  | 13.036516 | 6.075843  |
| 121.H | -2.552479 | 11.777427 | 16.212644 |
| 122.C | -3.682916 | 13.667650 | 16.689148 |
| 123.H | -4.591163 | 13.297498 | 17.158847 |
| 124.H | 2.161603  | 13.984043 | 6.753855  |
| 125.C | -3.360771 | 15.041252 | 16.444231 |
| 126.H | -3.973914 | 15.899677 | 16.705732 |
| 127.C | 4.671945  | 12.226608 | 9.104213  |
| 128.C | 2.156616  | 12.655672 | 15.198951 |
| 129.H | 1.597191  | 11.825916 | 14.744260 |
| 130.H | 1.752943  | 13.596627 | 14.798102 |
| 131.H | 1.954339  | 12.643491 | 16.279865 |
| 132.C | 4.917877  | 13.907711 | 15.758991 |
| 133.H | 4.552493  | 14.889391 | 15.421446 |
| 134.H | 6.001101  | 13.867212 | 15.564788 |
| 135.H | 4.768661  | 13.846016 | 16.849129 |
| 136.H | 4.472999  | 10.809820 | 16.665627 |
| 137.C | -3.380414 | 13.446747 | 12.628784 |
| 138.H | -2.498036 | 13.185842 | 12.050711 |
| 139.C | -4.223157 | 12.555265 | 13.365258 |
| 140.H | 4.088993  | 9.994687  | 15.130622 |
| 141.H | -4.088924 | 11.481827 | 13.473744 |
| 142.C | -5.283026 | 13.331875 | 13.946039 |
| 143.H | -6.085802 | 12.948293 | 14.570492 |
| 144.H | 5.698669  | 10.707628 | 15.381958 |
| 145.C | -5.080715 | 14.700742 | 13.579027 |
| 146.H | -5.708760 | 15.540847 | 13.862569 |
| 147.C | -2.052577 | 15.113463 | 15.826859 |
| 148.C | 3.396725  | 18.637266 | 6.982634  |
| 149.H | 4.480133  | 18.682126 | 7.170933  |
| 150.H | 3.252946  | 18.504680 | 5.898829  |
| 151.H | 2.995312  | 17.737483 | 7.474230  |
| 152.C | 3.361622  | 21.688336 | 6.675491  |

|       |           |           |           |
|-------|-----------|-----------|-----------|
| 153.H | 4.439792  | 21.743195 | 6.892850  |
| 154.H | 2.909154  | 22.646744 | 6.972079  |
| 155.H | 3.246338  | 21.590232 | 5.583826  |
| 156.C | 0.712818  | 20.168379 | 7.042730  |
| 157.H | 0.203914  | 19.304079 | 7.496441  |
| 158.C | 5.534163  | 13.373447 | 8.889608  |
| 159.H | 5.174795  | 14.397322 | 8.834191  |
| 160.C | 6.880056  | 12.920504 | 8.711750  |
| 161.H | 0.183064  | 21.078000 | 7.368058  |
| 162.H | 7.750761  | 13.543122 | 8.519632  |
| 163.C | 6.882783  | 11.489423 | 8.841026  |
| 164.H | 7.754031  | 10.843544 | 8.764149  |
| 165.H | 0.609260  | 20.092077 | 5.948535  |
| 166.C | 5.541394  | 11.067688 | 9.113060  |
| 167.H | 5.208821  | 10.044850 | 9.266883  |
| 168.C | 5.540000  | 12.494552 | 12.625070 |
| 169.C | 5.993994  | 17.333363 | 13.387811 |
| 170.H | 5.138482  | 16.654532 | 13.257210 |
| 171.H | 6.704938  | 16.843674 | 14.069498 |
| 172.H | 6.487769  | 17.447113 | 12.411156 |
| 173.C | 6.976107  | 20.092908 | 14.337961 |
| 174.H | 7.538559  | 20.229823 | 13.400911 |
| 175.H | 7.659002  | 19.638138 | 15.073541 |
| 176.H | 6.701059  | 21.090646 | 14.713274 |
| 177.C | 4.619903  | 18.731554 | 15.767412 |
| 178.H | 3.758791  | 18.052587 | 15.679921 |
| 179.C | 6.407144  | 13.602512 | 12.271322 |
| 180.H | 6.124352  | 14.648473 | 12.347050 |
| 181.C | 7.681113  | 13.087569 | 11.873542 |
| 182.H | 4.257399  | 19.681649 | 16.189780 |
| 183.H | 8.543178  | 13.673904 | 11.563397 |
| 184.C | 7.619322  | 11.653928 | 11.943130 |
| 185.H | 8.424636  | 10.967284 | 11.693767 |
| 186.H | 5.327481  | 18.290849 | 16.487581 |
| 187.C | 6.303051  | 11.288853 | 12.375112 |
| 188.H | 5.936841  | 10.277121 | 12.529416 |
| 189.C | 2.270301  | 21.508457 | 9.920352  |
| 190.C | -3.921704 | 14.789961 | 12.714352 |

## 7. References:

1. A. B. Pangborn, M. A. Giardello, R. H. Grubbs, R. K. Rosen and F. J. Timmers, *Organometallics*, 1996, **15**, 1518.
2. W. Huang, S. I. Khan and P. L. Diaconescu, *J. Am. Chem. Soc.*, 2011, **133**, 10410.
3. C. T. Carver and P. L. Diaconescu, *J. Am. Chem. Soc.*, 2008, **130**, 7558.
